# Supplementary material for: Patient experience of long-term recovery after open fracture of the lower limb: a qualitative study using interviews in a community setting
Source: PubMed Central journal article supplement (PMC6797425; doi:10.1136/bmjopen-2019-031261), 2019-10-09
Supplement: bmjopen-2019-031261.draft_revisions.pdf [file bmjopen-2019-031261.draft_revisions.pdf]

# BMJ Open

BMJ Open is committed to open peer review. As part of this commitment we make the peer review history of every article we publish publicly available.

When an article is published we post the peer reviewers' comments and the authors' responses online. We also post the versions of the paper that were used during peer review. These are the versions that the peer review comments apply to.

The versions of the paper that follow are the versions that were submitted during the peer review process. They are not the versions of record or the final published versions. They should not be cited or distributed as the published version of this manuscript.

BMJ Open is an open access journal and the full, final, typeset and author-corrected version of record of the manuscript is available on our site with no access controls, subscription charges or pay-per-view fees (<http://bmjopen.bmj.com>).

If you have any questions on BMJ Open's open peer review process please email [info.bmjopen@bmj.com](mailto:info.bmjopen@bmj.com)

# BMJ Open

## A qualitative study of long term recovery after open fracture of the lower limb

|                               |                                                                                                                                                                                                                                                                                                                                                               |
|-------------------------------|---------------------------------------------------------------------------------------------------------------------------------------------------------------------------------------------------------------------------------------------------------------------------------------------------------------------------------------------------------------|
| Journal:                      | <i>BMJ Open</i>                                                                                                                                                                                                                                                                                                                                               |
| Manuscript ID                 | bmjopen-2019-031261                                                                                                                                                                                                                                                                                                                                           |
| Article Type:                 | Original research                                                                                                                                                                                                                                                                                                                                             |
| Date Submitted by the Author: | 25-Apr-2019                                                                                                                                                                                                                                                                                                                                                   |
| Complete List of Authors:     | Rees, Sophie; University of Warwick, Warwick Clinical Trials Unit<br>Tutton, Elizabeth; University of Warwick,<br>Achten, Juul; University of Oxford, NDORMS<br>Bruce, Julie; University of Warwick, Warwick Clinical Trials Unit<br>Costa, Matthew; University of Oxford, Nuffield Department of<br>Orthopaedics, Rheumatology, and Musculoskeletal Sciences |
| Keywords:                     | Limb reconstruction < ORTHOPAEDIC & TRAUMA SURGERY,<br>REHABILITATION MEDICINE, QUALITATIVE RESEARCH                                                                                                                                                                                                                                                          |
|                               |                                                                                                                                                                                                                                                                                                                                                               |

SCHOLARONE™  
Manuscripts

## A qualitative study of long term recovery after open fracture of the lower limb

Sophie Rees<sup>1</sup> \*Elizabeth Tutton<sup>1,2,3</sup>, Juul Achten<sup>2</sup>, Julie Bruce<sup>1</sup>, Matthew Costa<sup>2</sup>

<sup>1</sup>Warwick Medical School, University of Warwick, Gibbet Hill Campus, Coventry, CV4 8UW, UK

<sup>2</sup>Oxford Trauma, Kadoorie Centre, Nuffield Department of Orthopaedics, Rheumatology and Musculoskeletal Sciences, University of Oxford

<sup>3</sup>Oxford University Hospitals NHS Foundation Trust, John Radcliffe Hospital, OX3 9DU, UK

**Email addresses:** s.rees.1@warwick.ac.uk, \*e.tutton@warwick.ac.uk; julie.bruce@warwick.ac.uk, juul.achten@ndorms.ox.ac.uk, matthew.costa@ndorms.ox.ac.uk

### \*CORRESPONDING AUTHOR

Elizabeth Tutton

e.tutton@warwick.ac.uk

Tel: 01865 223106

### Kadoorie Centre

Level 3, John Radcliffe Hospital

Oxford OX3 9DU

**Word Count:** 4097

**Keywords:** injury, recovery, open fracture, experience, qualitative, body image, self-identity

### ABSTRACT

**Objectives:** Treatment of open fractures is complex and patients may require muscle and skin grafts. The aim of this study was to gain a greater understanding of patient experience of recovery from open fracture of the lower limb two to four years post-injury.

**Design:** A phenomenological approach was used to guide the design of the study. Interviews took place between October 2016 and April 2017 in the participants' own homes or via telephone.

**Setting:** England, UK.

1  
2  
3 **Participants:** A purposive sample of 25 patients were interviewed with an age range of 26-80 years (median  
4  
5 51), 19 were male and six female, and time since injury was 24-49 months (median 35 months).  
6

7 **Results:** The findings identified a focus on struggling to recover as participants created a new way of living,  
8  
9 balancing moving forward with accepting how they are, whilst being uncertain of the future and experiencing  
10  
11 cycles of progress and setbacks. This was expressed through three themes: i) 'being disempowered' with the  
12  
13 emotional impact of dependency and uncertainty, ii) 'being changed' and living with being fragile and being  
14  
15 unable to move freely and iii) 'being myself' with a loss of self, feeling and looking different, alongside  
16  
17 recreation of self in which they integrated the past, present and future to find meaningful ways of being  
18  
19 themselves.  
20

21 **Conclusion:** This study identified the long-term disruption caused by serious injury, the hidden work of  
22  
23 integration that is required in order to move forward and maximise potential for recovery. Supportive  
24  
25 strategies that help people to self-manage their everyday emotional and physical experience of recovery from  
26  
27 injury are required. Research should focus on developing and testing effective interventions that provide  
28  
29 support and self-management within a holistic rehabilitation plan.  
30

## 31 32 **ARTICLE SUMMARY**

### 33 34 **Strengths and limitations of this study**

35  
36 Use of in-depth qualitative interviews has provided rich data and new insights into the hidden work  
37  
38 undertaken by patients as they recover from major lower leg injury.  
39

40  
41 The variation and patterns within the patients' experience may help healthcare providers focus effective  
42  
43 strategies to maximise emotional and physical recovery over the longer term.  
44  
45

46  
47 Our study was intentionally exploratory in nature and the resulting framework requires further exploration in  
48  
49 diverse samples to assess its transferability.  
50

## 51 52 **INTRODUCTION**

53  
54 Open fractures of the lower limb (where the bone protrudes through the skin) occur in an estimated 30% of  
55  
56 fractures of the tibia.<sup>[1]</sup> Treatment is complex as the wound requires surgical cleaning before fixation of the  
57  
58 bone, often followed by muscle and skin grafting. The UK WOLLF Wound management of Open Lower Limb  
59  
60

1  
2  
3 Fractures trial compared standard dressings with Negative Pressure Wound Therapy.<sup>[2]</sup> Negative Pressure  
4  
5 Wound Therapy is a type of dressing that applies a gentle suction to the wound removing excess fluid. Two  
6  
7 qualitative sub-studies of this trial were undertaken to explore the lived experience of patients with an open  
8  
9 fracture of the lower limb, firstly during hospitalisation, and secondly, this paper presents the findings from  
10  
11 two to four years post-injury.  
12

13  
14 There is increasing evidence that the impact of open fracture of the lower limb can be life changing with  
15  
16 prolonged periods of recovery. Embodied vulnerability conveys how patients with open fractures of the lower  
17  
18 limb struggled to cope with their emotional distress, their changed body which included their wounds, body  
19  
20 image, pain and the uncertain nature of their future life.<sup>[3]</sup> Recovery can be slow and patients can find it hard  
21  
22 to return to their pre-injury lives even 2 years after an open fracture.<sup>[4]</sup> Studies with a broader sample of  
23  
24 injured patients identify the ongoing challenge of daily living, being able to work and body image.<sup>[5]</sup> There is  
25  
26 also evidence of persisting psychological distress.<sup>[6]</sup> This qualitative study aimed to extend our knowledge of  
27  
28 patient experience of recovery from an open fracture of the lower limb up to four years post injury to provide  
29  
30 direction for long term support and rehabilitation.  
31

### 32 33 **METHODS**

34  
35 This study was informed by phenomenology and the work of Heidegger<sup>[7]</sup> used in other studies of injury.<sup>[8,9]</sup>  
36  
37 This enabled participants to share their experience of everyday life within their social and cultural context. It  
38  
39 uncovered insights into how they know and understand their world and what is important to them. Immersion  
40  
41 in the data and interpretation led to an understanding of the meanings inherent in the everyday world of the  
42  
43 participant. The project was given ethical approval by West Midlands Coventry and Warwickshire Research  
44  
45 Ethics Committee (REC Reference: 12/WM/0001) in June 2016.  
46

47  
48 A purposive sample of 25 participants were recruited between October 2016 and April 2017, during routine  
49  
50 follow up. Interviewees were participants in the UK WOLLF trial<sup>[2]</sup> and had received reconstructive surgery for  
51  
52 an open fracture to the lower limb. Purposive sampling included a range of sex, age and grade of severity of  
53  
54 injury. Most participants had a Gustilo and Anderson<sup>[10]</sup> grade of 3, indicating they were the more severely  
55  
56 injured, having a greater likelihood of needing skin or muscle grafts. See table I for information on the  
57  
58 participants sex, age, time since injury, cause of injury and injury severity. Two people approached chose not  
59  
60

to take part due to personal circumstances and lack of time. Respondents received a patient information sheet and provided written or oral consent to take part in an interview. The interviews focused on the participants' lived experience of recovery from injury and were lightly structured to cover their thoughts, feelings, activities, function and work. Open questions such as 'what has it been like for you since your injury', with prompts such as 'tell me more about that', 'how did that feel', were used to enable participants to share their experience. Two female health researchers with PhDs who did not know the participants undertook the interviews (SR (n=15) and ET (n=10)), either face-to-face (usually at the participant's own home, once at a nearby hospital) or over the telephone. Two participants were accompanied by their partners. Care was taken to support participants and respect their privacy and dignity. One interviewer had experience of interviewing patients with cancer and a background in medical sociology, the other had prior experience of interviewing patients with traumatic orthopaedic injuries. Interviews lasted 25-100 minutes (average 60 minutes) and were digitally audio-recorded and transcribed verbatim. Data was anonymised and held on secure password protected University computers. None of the participants wished to see a copy of their transcript.

Table 1 Information about participants

| <b>Table 1 Information about participants</b>          |                               |
|--------------------------------------------------------|-------------------------------|
| <b>Characteristics</b>                                 | <b>Number of participants</b> |
| Sex                                                    |                               |
| Male                                                   | 19                            |
| Female                                                 | 6                             |
| <b>Age (years) mean 51, range 26-80</b>                |                               |
| 18-29                                                  | 4                             |
| 30-49                                                  | 8                             |
| 50-69                                                  | 9                             |
| 70-80                                                  | 4                             |
| <b>Time since injury (months) mean 31, range 24-49</b> |                               |
| 24-35 months                                           | 14                            |
| 36-49 months                                           | 11                            |

|                                                    |    |
|----------------------------------------------------|----|
| <b>Cause of Injury</b>                             |    |
| Car collision                                      | 8  |
| Motorbike collision                                | 5  |
| Pedestrian-vehicle collision                       | 3  |
| Fall from height/stairs                            | 3  |
| Crush injury at work                               | 3  |
| Low energy fall (from standing)                    | 2  |
| Bicycle-vehicle collision                          | 1  |
| <b>Injury severity, Gustilo and Anderson grade</b> |    |
| 2                                                  | 4  |
| 3                                                  | 18 |
| 3+                                                 | 3  |

Patient and public involvement (PPI) was integral to the management structure for the UK WOLLF study. Four patients with similar injuries helped the researchers reflect on their interpretations during analysis. The UK Musculoskeletal Trauma (PPI) group are involved in dissemination of the findings.

Analysis was an iterative process involving initial coding of sections of the data to label the underlying meaning or 'what is going on' in the data such as 'feeling sad due to lack of progress'. Codes were collected together with other similar codes to create categories such as 'being uncertain'. Differences and challenges within interviews and across interviews were written up in fieldnotes and memos, and discussed. Categories were collected together to create themes or 'structures of experience'<sup>[11]</sup> such as 'being disempowered'. NVivo 11 a qualitative software package was used to manage the data (QSR Warrington, UK). The findings were shared and discussed with the broader research team.

Rigour was demonstrated through trustworthiness.<sup>[12]</sup> Both researchers were engaged with the data, held regular discussions and reflected on their positionality throughout analysis. Auditability was demonstrated through the identification of themes and categories (table 2) and use of quotes to illustrate them. Saturation of themes and categories was achieved. Resonance with the findings was identified by four patients with

similar injuries. Additional insights were challenges with intimacy and gratefulness for care provided.

Multidisciplinary staff also found the findings resonated with their experience of clinical practice.

## RESULTS

### Overarching theme: Struggling to recover

The findings, presented in table 2, convey the overarching theme of 'struggling to recover' as an experiential process in which participants aim to make sense of their injury, balance striving to move forward with accepting how they are, and find meaningful ways of living whilst being uncertain of the future and experiencing cycles of progress and setbacks.

Table 2: Key themes and categories identified from the qualitative interviews

| Theme                                | Category                                            | Definition                                                                                                                                                                                                                                                        |
|--------------------------------------|-----------------------------------------------------|-------------------------------------------------------------------------------------------------------------------------------------------------------------------------------------------------------------------------------------------------------------------|
| <b>Theme 1</b><br>Being disempowered |                                                     | Being disempowered conveyed the emotional and physical impact on participants of loss of personal control over their life and was expressed through the categories 'being dependent on others' and 'being uncertain about the future'.                            |
|                                      | <b>Category</b><br>Being dependent on others        | Being dependent on others was a process of accepting help from others whilst striving to maintain a sense of independence through activities that supported their mental and physical wellbeing.                                                                  |
|                                      | <b>Category</b><br>Being uncertain about the future | Being uncertain about the future conveyed the emotional impact of not knowing their potential degree of recovery, and what life would be like in the future.                                                                                                      |
| <b>Theme 2</b><br>Being changed      |                                                     | Being changed identified how their body no longer looks, feels or functions in ways it previously had done. Everyday life involved a process of re-negotiating where participants learnt through experience what they could do and how they felt about their body |

|                             |                                                |                                                                                                                                                                                                                                          |
|-----------------------------|------------------------------------------------|------------------------------------------------------------------------------------------------------------------------------------------------------------------------------------------------------------------------------------------|
|                             |                                                | whilst striving to regain and retain normal activities. It was expressed through the categories of being fragile and being unable to move freely.                                                                                        |
|                             | <b>Category</b><br>Being fragile               | Being fragile conveyed a sense of their body as looking and feeling less robust, less trustworthy, less reliable and active engagement was required to reconnect in a positive way with their changed body.                              |
|                             | <b>Category</b><br>Being unable to move freely | Being unable to move freely was the loss of ease, fluidity and previously taken-for-granted ways of moving, it affected their ability to use certain geographical spaces and effort was required to improve levels of physical activity. |
| <b>Theme 3</b> Being myself |                                                | Being myself was an active process of integrating injury into their sense of who they were as a person, bringing together the past, present and future. It was expressed through loss of self and recreating me.                         |
|                             | <b>Category</b><br>Loss of self                | Loss of self was expressed as participants felt and looked different and were unable to fulfil their normal roles and activities as they did prior to their injury.                                                                      |
|                             | <b>Category</b><br>Recreating me               | Recreating me referred to the ways in which participants made sense of their altered selves, worked on their body and mind to find meaningful ways of being and living.                                                                  |

In struggling to recover participants conveyed that their 'taken for granted' ways of living experienced prior to injury were replaced with daily challenge as they endured symptoms such as persistent pain. They often hid the struggle to keep going to maximise participation and maintain a sense of progression.

1  
2  
3 They can see people walking but there is no light or pain-meter on top of the head that says 'this guy  
4  
5 is in absolute agony but he's not going to stop walking because he doesn't want to go in a mobility  
6  
7 scooter'. People look at you and say 'You're getting on great aren't you?' All you really just want to  
8  
9 say to them is 'Every day I struggle' and some days you just want to sit and cry your eyes out. – P13  
10

11 Loss caused by injury led participants to re-negotiate how they live and to integrate their past and present self  
12  
13 into new ways of being. This was portrayed through the themes of being disempowered, being changed, and  
14  
15 being myself.  
16

#### 17 18 19 Theme 1: Being disempowered

20 The impact on participants' loss of control over their life was expressed through the categories 'being  
21  
22 dependent on others' and 'being uncertain about the future'.  
23

##### 24 25 *Being dependent on others*

26  
27  
28 Many participants had prolonged periods where they were not able to put weight through their injured leg,  
29  
30 and some had injuries to both legs. Dependency on others created frustration, boredom, distress, dismay, was  
31  
32 undignified, lowered their mood and was epitomised by not even being able to perform simple tasks, such as  
33  
34 to make a cup of tea.  
35

36 I don't know if it's a man thing or male thing, I don't know. It's your dignity, I mean the last person  
37  
38 who wiped my arse was my mum and that's it, or my dad, but being a grown man using a bed pan  
39  
40 because I couldn't get out of bed was awful. – P06  
41

42  
43 In this state of profound dependency their body became central to everyday life, its needs and limitations  
44  
45 explicitly governing every aspect of everyday life.  
46

47 You feel a bit like a passenger in it all because you're on the outside looking in and you think you're  
48  
49 being a bit of a burden on everyone. At the time I found it quite hard to almost tell people that's how  
50  
51 I felt, I feel this, 'I feel a bit worthless'. – P18  
52  
53

54 Constant support for daily bodily needs could lower their mood so that they could no longer see the 'light at  
55  
56 the end of the tunnel' (P17) evident in suicidal thoughts.  
57  
58  
59  
60

1  
2  
3 I thought about topping myself because it's like I've been independent all my life. ... One night I had  
4 all the tablets, Tramadol. – P06  
5  
6  
7

8 Dependency on others was a disempowering experience that led to emotional vulnerability. Expressing how  
9 they felt was challenging in the context of being grateful for the care they had received and some had suicidal  
10 thoughts.  
11  
12  
13

#### 14 *Being uncertain about the future*

15  
16  
17 Being uncertain about their future added to participants' sense of disempowerment. Participants found it hard  
18 to imagine walking properly or returning to pre-injury activities and a 'wait and see' approach added to their  
19 sense of uncertainty.  
20  
21  
22

23 I would say that was the toughest part, was just the un-endingness of it, it was just constant and it  
24 was horrible. – P19  
25  
26  
27

28 I did think in my mind you know 'it will heal and then I've got rehabilitation' but this whole non-union,  
29 it just dragged on and on and on, I couldn't see an end. ... I wished I'd known about the non-union,  
30 err, it was almost hidden from me. ... I said 'well I thought that the operation was successful?' then he  
31 told me 'well it was because we would've cut your leg off years ago'. – P21  
32  
33  
34  
35  
36

37 There was a degree of anxiety regarding their future and ability to live and work productively.  
38  
39

40 You want to live for the future now because that's what you've got in front of you but you worry  
41 about what it's going to bring, not only physically but financially as well. You have no idea what your  
42 pay-out is going to be and so my life is in somebody else's hands. There is that horrible thought that  
43 you may have to go back out to work, force yourself to work because financially you can't exist for the  
44 rest of your life. – P13  
45  
46  
47  
48  
49

50 Their capacity to heal often determined their future; leaving them feeling uncertain, disempowered and  
51 anxious. This was exacerbated by setbacks such as non-union (also noted in recreating me) that reduced their  
52 ability to sustain recovery.  
53  
54  
55  
56  
57  
58  
59  
60

1  
2  
3 Theme 2: Being changed  
4

5 Participants felt they were changed from how they were pre-injury expressed in categories 'being fragile' and  
6  
7 'being unable to move freely'.  
8

9  
10 *Being fragile*

11 Participants were predominantly young or middle-aged adults, and many had been previously fit and active  
12  
13 individuals. They now felt their body was older, weaker, and more fragile.  
14

15  
16 I can't dig. ... I feel like I've got a weakness which has left me feeling like I've got a bit of a disability. –

17  
18 P21  
19

20  
21 Participants felt a need to protect their injured body, or at least the injured limb, including avoiding activities  
22  
23 due to the fear of experiencing another injury.  
24

25  
26 You're frightened it's gonna (going to) break again. – P02  
27

28  
29 The sense of a whole, continuous body which the participants felt they could trust to do the activities they  
30  
31 wanted to do was disturbed and instead participants could experience their bodies as alien and fragile.  
32

33 I do go running and I wear long running trousers because I think if I see it (the muscle graft) it makes  
34  
35 me feel like there's a weakness there and it makes me very aware, I don't think it is any weaker the  
36  
37 leg but mentally it makes me think it's a bit weaker and I just find it distracting as well if I exercise it. I  
38  
39 probably would be over-cautious and not really exercise it properly if I could see it I think. – P14  
40

41  
42 Some participants described feeling distanced or alienated from the injured part of their body.  
43

44  
45 I don't look at it as my leg anymore. ... It is like the legs belongs to somebody else they don't  
46  
47 particularly belong to me. – P19  
48

49  
50 Their injured body part was no longer fully integrated into their perception of their body. Parts of their body  
51  
52 had literally shifted places as skin/muscle from other areas of the body had been transplanted to cover the  
53  
54 defect in the leg. Pain and numbness could increase this sense of alienation.  
55  
56  
57  
58  
59  
60

1  
2  
3 Participants hid or covered up their injured leg, to avoid others perceiving them as fragile, less capable or  
4  
5 weak. For some participants the struggle with healing, pain and lack of mobility was so exhausting, that they  
6  
7 thought amputation might improve their chances of mobility and a better quality of life.  
8  
9

10           There were a couple of times in it all when I thought, would it be better off to say take it off but I  
11  
12           knew how hard and how much effort people had put in to make sure that leg was staying where it  
13  
14           was. – P18  
15

16           If you took me back in time and I knew then what I know now I would have said ‘take my leg off now’.  
17  
18           I’d be four years down the line with a prosthetic and I could probably still be working. – P13  
19

20  
21 Being fragile highlighted the unreliability of their body and continued vulnerability to further injury. The sense  
22  
23 of a ‘whole’ body could be disrupted and amputation was considered in an effort to improve chances of  
24  
25 recovery.  
26

### 27 28 *Being able to move freely* 29

30  
31 Despite being between two to four years post injury, participants felt they were not able to move with the  
32  
33 same fluidity or spontaneity. The way they walked, their pace, gait or balance was different.  
34

35           I can’t move fast anymore. – P17  
36

37  
38           My balance was all over the place, it still is, sometimes I feel like I’m falling to the side, it’s a weird  
39  
40           feeling. – P01  
41

42           I waddle, I walk like a penguin it’s the only way I can balance, sort of putting weight on one foot and  
43  
44           then going over to the next foot, I can’t stride out anymore. – P02  
45

46  
47 Specific activities such as being able to kneel prevented them from moving as freely. As did the weight of the  
48  
49 muscle graft (notable when sleeping), swelling and pain. Persistent pain reduced their ability to move and join  
50  
51 in activities, it varied in type and duration but sometimes was prolonged and often unpredictable.  
52

53  
54           I sit down for an hour and I get up, oh the pain you can’t describe it, but I mean it’s for seconds but  
55  
56           it’s enough to, it’s really, really painful. – P02  
57  
58  
59  
60

1  
2  
3 Participants experienced restrictions on the spaces and places they felt confident occupying. They were  
4 worried about falling and injuring themselves again. The terrain underfoot, types of floor or ground could  
5 cause pain leading them to be constantly vigilant.  
6  
7  
8  
9

10 Participants felt changed, even if they had returned to work, often with an increased sense of fragility, loss of  
11 fluidity and pace of movement, combined with specific functional losses. They hid this fragility from others,  
12 undertook additional planning for daily activities, limited social participation and changed their work roles in  
13 order to cope with their injury.  
14  
15  
16  
17

### 18 Theme 3: Being myself

19 Participants worked to integrate their injury into their lives expressed through 'loss of self' and 'recreating me'.  
20  
21  
22

#### 23 *Loss of self*

24 In loss of self, there was a sense that the body 'restricts me from being me' and participants had to adapt to  
25 being different from their pre-injury state.  
26  
27  
28  
29

30 It seemed like a part of my life stopped at 6.45 on (date of injury) and a new life started. ... I used to  
31 think nothing of walking ten to fifteen miles a day along disused railway lines and things like that, we  
32 were avid walkers. – P04  
33  
34  
35  
36

37 Participants' current experience contradicted their memories of who they were.  
38  
39

40 I have 55 years' worth of memories inside my head so you think 'Oh I used to go running on a  
41 Saturday morning'. ... You try and be the person you were before and you can't be because you are  
42 95% of what you used to be. But it's just that 5% area that causes you 100% of the problems. – P13  
43  
44  
45  
46

47 Some days I, I could scream. I wake in the morning and 'cause you forget', you know when you go to  
48 sleep, and I wake up in the morning thinking I can just jump out of bed and I can't and then it hits you  
49 and you think 'Oh God I can't do this!' – P02  
50  
51  
52  
53

54 Their body thwarted their attempts to return to their former selves. Despite regaining their independence and  
55 feeling that their healthcare team considered them to be recovered, the participants were continually  
56 reminded of their injured bodies.  
57  
58  
59  
60

1  
2  
3 It's very difficult to have a day where you are not conscious of 'that hurts'. ... In an active way you are  
4  
5 kind of constantly reminded because it's never quite the same day to day. – P22  
6  
7

8 In contrast to younger patients, older participants located the injury within the context of prior conditions and  
9  
10 they did not experience the same degree of challenge to their identity.  
11

12 The event (which) bears more on how I think about life in general is having been fortunate to survive  
13  
14 a heart attack ten years ago. ... So that sort of in a way puts things in perspective. I know falling off a  
15  
16 roof can initially be thought of as a life-threatening event but a cardiac arrest is definitely a life-  
17  
18 threatening event! – P08  
19

20  
21 Participants struggled with the loss of their pre-injured self and the activities that defined them. Despite  
22  
23 attempts to move forward and integrate with the present they found their unreliable body provided sensory  
24  
25 reminders of their loss and their injury.  
26

### 27 *Recreating me*

28  
29  
30 In making sense of their injury they reflected on how life had been and tried to reconcile this with how they  
31  
32 felt now.  
33

34  
35 It did come as a revelation about three weeks ago, just you know, I can't carry on doing this, I can't  
36  
37 keep pushing to get my life back, it's got you know, I've got to change, you know it is a bit of a shock!  
38  
39 – P19  
40

41  
42 I used to think 'I wished the thing had never fallen on me!' but now I think I've got to that stage where  
43  
44 I've passed that and I think I have just slipped, probably slipped back into normality if, um, I, I sort of  
45  
46 lived with this problem and that's then become me, so maybe you adapt. – P21  
47

48  
49 Participants tried to return to usual activities but recovery was characterised by ups and downs. Injuries  
50  
51 occurred from stress fractures to snapped hamstrings (muscles at the back of the thigh) and iliotibial bands  
52  
53 (connective tissue running from the pelvis to the knee). Only a small number of participants reported receiving  
54  
55 enough physiotherapy after their injury. Those who received physiotherapy (usually privately), described a  
56  
57 more purposeful recovery with fewer examples of setbacks and less uncertainty.  
58  
59  
60

1  
2  
3 I think she took it upon herself to get me back to where I wanted to be and I think she listened to  
4  
5 what I wanted out of life. – P18  
6

7  
8 Some participants expressed gratitude to be alive or to have avoided amputation. They tried to locate meaning  
9  
10 in what happened to them.

11  
12 I went back and met another patient and his family and I hope that I gave them a little bit more hope.  
13  
14 ... It was good for me as well for my rehabilitation to feel that it wasn't all for nothing. – P18  
15

16  
17 For these participants, they were able to find meaning in their injury, and so to incorporate it into their  
18  
19 biography, or their story of themselves. Participants engaged in 'body work' in order to convey a sense of  
20  
21 normality and provide the appearance of a non-injured body. However, often participants described struggling  
22  
23 with the difference between others' expectations and the reality of their everyday experience.  
24

25  
26 I think when people think you're doing so well physically they just think 'she's doing really well' and  
27  
28 you almost don't want to turn around and say 'well actually I'm really struggling with this, that and  
29  
30 the other' because I just don't want to disappoint people or turn it into a negative thing. – P14,  
31

32  
33 In recreating me the participants were hindered by their injured body and a lack of supportive therapies but  
34  
35 tried to integrate their past and present self-identity. New opportunities and meaningful ways of living that  
36  
37 were beneficial could be found. There was a strong desire to appear normal and participants struggled to be  
38  
39 themselves.  
40  
41  
42  
43  
44  
45  
46

## 47 **DISCUSSION**

48  
49 This qualitative study adds to recent research on the patient experience of open fractures of the lower limb in  
50  
51 acute care<sup>[3,9]</sup> and post injury<sup>[4]</sup> by identifying the ongoing recovery undertaken by patients to process the  
52  
53 impact of injury on their sense of being disempowered, being changed and being myself. We have specifically  
54  
55 focussed on the longer-term (two to four year post-injury) impact of these injuries and especially in those  
56  
57 patients who were identified as having injuries on the 'severe' end of the spectrum. We found that the  
58  
59 concept of embodied vulnerability,<sup>[3,9]</sup> and endurance in early recovery<sup>[8]</sup>, clearly identified in acute care, also  
60

1  
2  
3 extends into the longer-term as participants struggle to recover, processing their loss, working to negotiate  
4 how they live and integrate changes within their self-identity. Our findings indicate that longer term clinical  
5 support is required to improve outcomes for mental health, function, management of pain and living with  
6 disability in patients with major trauma to the lower limbs.  
7  
8  
9

10  
11  
12 There were some potential limitations to our study. The sample was purposive within the UK WOLLF  
13 population and saturation of data was achieved. However, the sample was not ethnically diverse and sampling  
14 at specific time points during recovery may have increased the transferability of the study to other  
15 populations. Four patients with similar injuries felt their personal experience resonated with the findings of  
16 this study however they also highlighted the joy of recovery, gratefulness to staff for their care, the similarity  
17 of the findings to, but also the difference from, their individual experience. Despite these limitations, this study  
18 provides evidence that patients who suffered the more severe injuries may benefit from enhanced clinical  
19 attention that focusses on distress, uncertainty, fragility and body image over a prolonged period of time.  
20 Psychological distress<sup>[6,13]</sup> is present in this group and may be linked to ongoing disability.<sup>[14]</sup> The continued  
21 uncertainty that patients feel reflects elements of a chaos narrative (Frank 1995), where loss of control means  
22 it is hard to find meaning in daily life. In our study despair, noted in recovery from trauma <sup>[15]</sup> was expressed as  
23 suicidal thoughts. Their perceptions of the body as fragile and weak suggest a state of dys-embodiment<sup>[16]</sup> <sup>[17]</sup>  
24 where dysfunction highlights the loss of normal taken for granted ways of being. Ongoing disruption to body  
25 image is noted in studies of stigma and disfigurement<sup>[18]</sup> and in societal pressure to appear recovered<sup>[19]</sup> and  
26 attractive.<sup>[20]</sup> In this study, amputation was considered as an alternative solution to continued challenges and  
27 dissociation from the body occurred, as in other specialities.<sup>[21]</sup> Patients' progression towards integration of  
28 physical change and self-identity was hindered by reminders of their injury, such as persistent pain, as their  
29 unreliable body<sup>[22]</sup> was unable to achieve the intended activity. This process is noted in chronic illness<sup>[23]</sup> and  
30 major trauma patients three to six months post injury.<sup>[24]</sup> Support that enables patients to feel a greater sense  
31 of empowerment and integrate bodily changes within their self-identity may be helpful. Research should  
32 therefore focus on developing and testing effective interventions that provide longer term support and self-  
33 management within a holistic rehabilitation plan.  
34  
35  
36  
37  
38  
39  
40  
41  
42  
43  
44  
45  
46  
47  
48  
49  
50  
51  
52  
53  
54  
55

## 56 STATEMENTS

### 57 Funding statement

1  
2  
3 This work was supported by the UK National Institute for Health Research, Health Technology Assessment  
4 (HTA) Programme (project number 10/57/20) and was supported by the National Institute for Health Research  
5 (NIHR) Oxford Biomedical Centre.  
6  
7  
8

#### 9 10 **Competing interests**

11  
12 No benefits have been received or will be received from a commercial party related directly or indirectly to the  
13 subject of this article.  
14

#### 15 16 17 **Acknowledgements**

18  
19 The authors would like to thank all the patients who generously gave their time and energy to support this  
20 study.  
21  
22

#### 23 24 25 **Author contributions**

26  
27 SR and ET contributed equally to this paper. The design, data collection, analysis and drafting of the paper  
28 were jointly undertaken by SR and ET. The team JA, JB, CM supported the project, were involved in discussion  
29 of the findings and the development of this paper.  
30  
31  
32

#### 33 34 35 **Ethical approval**

36  
37 The project was given ethical approval by West Midlands Coventry and Warwickshire Research Ethics  
38 Committee (REC Reference: 12/WM/0001) in June 2016.  
39  
40

#### 41 42 43 **Consent and Confidentiality**

44  
45 All participants received an information sheet and at least 24 hours to consider their participation. Written  
46 informed consent or verbal consent over the telephone were obtained.  
47  
48

#### 49 50 51 **Check list**

52  
53 The checklist has been completed and submitted.  
54

#### 55 56 57 **Data sharing statement**

58  
59 No additional data are available.  
60

#### **Exclusive License**

1  
2  
3 The Submitting Author accepts and understands that any supply made under these terms is made by BMJ to  
4  
5 the Submitting Author unless you are acting as an employee on behalf of your employer or a postgraduate  
6  
7 student of an affiliated institution which is paying any applicable article publishing charge (“APC”) for Open  
8  
9 Access articles. Where the Submitting Author wishes to make the Work available on an Open Access basis (and  
10  
11 intends to pay the relevant APC), the terms of reuse of such Open Access shall be governed by a Creative  
12  
13 Commons licence – details of these licences and which Creative Commons licence will apply to this Work are  
14  
15 set out in our licence referred to above.  
16  
17

## 18 REFERENCES

- 19
- 20
- 21 1. Court-Brown C, Bugler KE, Clement ND, et al. The epidemiology of open fractures in adults. A 15-  
22 year review. *Injury* 2012;43(6):891-97.
- 23 2. Costa ML, Achten J, Bruce J, et al. Effect of Negative Pressure Wound Therapy vs Standard Wound  
24 Management on 12-Month Disability Among Adults With Severe Open Fracture of the Lower  
25 Limb: The WOLLF Randomized Clinical Trial. *JAMA* 2018;319(22):2280-88. doi:  
26 10.1001/jama.2018.6452
- 27 3. Tutton E, Achten J, Lamb SE, et al. A qualitative study of patient experience of an open fracture of  
28 the lower limb during acute care. *Bone Joint J* 2018;100-B(4):522-26. doi: 10.1302/0301-  
29 620X.100B4.BJJ-2017-0891.R1
- 30 4. Trickett R, Mudge E, Price P, et al. A qualitative approach to recovery after open tibial fracture: the  
31 road to a novel, patient-derived recovery scale. *Injury* 2012;43(7):1071-78.
- 32 5. McPhail SM, Dunstan J, Canning J, et al. Life impact of ankle fractures: qualitative analysis of  
33 patient and clinician experiences. *BMC musculoskeletal disorders* 2012;13(1):224.
- 34 6. McCarthy ML, MacKenzie EJ, Edwin D, et al. Psychological distress associated with severe lower-  
35 limb injury. *JBJS* 2003;85(9):1689-97.
- 36 7. Heidegger M. Being and Time. Oxford: Blackwell Publishing Ltd 1962.
- 37 8. Keene DJ, Mistry D, Nam J, et al. The Ankle Injury Management (AIM) trial: a pragmatic,  
38 multicentre, equivalence randomised controlled trial and economic evaluation comparing  
39 close contact casting with open surgical reduction and internal fixation in the treatment of  
40 unstable ankle fractures in patients aged over 60 years. *Health Technol Assess*  
41 2016;20(75):1-158. doi: 10.3310/hta20750
- 42 9. Costa ML, Achten J, Bruce J, et al. Negative-pressure wound therapy versus standard dressings for  
43 adults with an open lower limb fracture: the WOLLF RCT. *Health Technol Assess*  
44 2018;22(73):1-162. doi: 10.3310/hta22730 [published Online First: 2018/12/24]
- 45 10. Gustilo RB, Anderson JT. Prevention of infection in the treatment of one thousand and twenty-  
46 five open fractures of long bones: retrospective and prospective analyses. *J Bone Joint Surg*  
47 *Am* 1976;58(4):453-8.
- 48 11. Van Manen M. Researching Lived Experience, human science for an action sensitive pedagogy.  
49 Albany: State University of New York Press 1990.
- 50 12. Lincoln YS, Guba E. Naturalistic Inquiry. Newbury Park, California: Sage Publications Inc 1985.
- 51 13. Bryant RA, O'Donnell ML, Creamer M, et al. The psychiatric sequelae of traumatic injury. *Am J*  
52 *Psychiatry* 2010;167(3):312-20. doi: 10.1176/appi.ajp.2009.09050617
- 53 14. Crichlow RJ, Andres PL, Morrison SM, et al. Depression in orthopaedic trauma patients.  
54 Prevalence and severity. *J Bone Joint Surg Am* 2006;88(9):1927-33. doi:  
55 10.2106/JBJS.D.02604
- 56
- 57
- 58
- 59
- 60

- 1
- 2
- 3
- 4 15. Tutton E, Seers K, Langstaff D. Hope in orthopaedic trauma: a qualitative study. *Int J Nurs Stud*
- 5 2012;49(7):872-9. doi: 10.1016/j.ijnurstu.2012.01.013
- 6
- 7 16. Leder D. *The absent body*: University of Chicago Press 1990.
- 8 17. Williams SJ. The vicissitudes of embodiment across the chronic illness trajectory. *Body & Society*
- 9 1996;2(2):23-47.
- 10 18. Rumsey N, Harcourt D. Body image and disfigurement: issues and interventions. *Body Image*
- 11 2004;1(1):83-97. doi: 10.1016/S1740-1445(03)00005-6
- 12 19. Rees S. A qualitative exploration of the meaning of the term "survivor" to young women living
- 13 with a history of breast cancer. *Eur J Cancer Care (Engl)* 2018;27(3):e12847. doi:
- 14 10.1111/ecc.12847 [published Online First: 2018/04/10]
- 15 20. Nuffield Council on Bioethics. *Cosmetic procedures, 2017*.
- 16 21. Thorpe G, McArthur M, Richardson B. Bodily change following faecal stoma formation:
- 17 qualitative interpretive synthesis. *J Adv Nurs* 2009;65(9):1778-89. doi: 10.1111/j.1365-
- 18 2648.2009.05059.x
- 19 22. Kvigne K, Kirkevold M. Living with bodily strangeness: women's experiences of their changing and
- 20 unpredictable body following a stroke. *Qual Health Res* 2003;13(9):1291-310.
- 21 23. Charmaz K. The body, identity, and self. *The Sociological Quarterly* 1995;36(4):657-80.
- 22 24. Claydon JH, Robinson L, Aldridge SE. Patients' perceptions of repair, rehabilitation and recovery
- 23 after major orthopaedic trauma: a qualitative study. *Physiotherapy* 2017;103(3):322-29. doi:
- 24 10.1016/j.physio.2015.11.002
- 25
- 26
- 27
- 28
- 29
- 30
- 31
- 32
- 33
- 34
- 35
- 36
- 37
- 38
- 39
- 40
- 41
- 42
- 43
- 44
- 45
- 46
- 47
- 48
- 49
- 50
- 51
- 52
- 53
- 54
- 55
- 56
- 57
- 58
- 59
- 60

## COREQ (COnsolidated criteria for REporting Qualitative research) Checklist

A checklist of items that should be included in reports of qualitative research. You must report the page number in your manuscript where you consider each of the items listed in this checklist. If you have not included this information, either revise your manuscript accordingly before submitting or note N/A.

| Topic                                          | Item No. | Guide Questions/Description                                                                                                                              | Reported on Page No. |
|------------------------------------------------|----------|----------------------------------------------------------------------------------------------------------------------------------------------------------|----------------------|
| <b>Domain 1: Research team and reflexivity</b> |          |                                                                                                                                                          |                      |
| <i>Personal characteristics</i>                |          |                                                                                                                                                          |                      |
| Interviewer/facilitator                        | 1        | Which author/s conducted the interview or focus group?                                                                                                   |                      |
| Credentials                                    | 2        | What were the researcher's credentials? E.g. PhD, MD                                                                                                     |                      |
| Occupation                                     | 3        | What was their occupation at the time of the study?                                                                                                      |                      |
| Gender                                         | 4        | Was the researcher male or female?                                                                                                                       |                      |
| Experience and training                        | 5        | What experience or training did the researcher have?                                                                                                     |                      |
| <i>Relationship with participants</i>          |          |                                                                                                                                                          |                      |
| Relationship established                       | 6        | Was a relationship established prior to study commencement?                                                                                              |                      |
| Participant knowledge of the interviewer       | 7        | What did the participants know about the researcher? e.g. personal goals, reasons for doing the research                                                 |                      |
| Interviewer characteristics                    | 8        | What characteristics were reported about the interviewer/facilitator? e.g. Bias, assumptions, reasons and interests in the research topic                |                      |
| <b>Domain 2: Study design</b>                  |          |                                                                                                                                                          |                      |
| <i>Theoretical framework</i>                   |          |                                                                                                                                                          |                      |
| Methodological orientation and Theory          | 9        | What methodological orientation was stated to underpin the study? e.g. grounded theory, discourse analysis, ethnography, phenomenology, content analysis |                      |
| <i>Participant selection</i>                   |          |                                                                                                                                                          |                      |
| Sampling                                       | 10       | How were participants selected? e.g. purposive, convenience, consecutive, snowball                                                                       |                      |
| Method of approach                             | 11       | How were participants approached? e.g. face-to-face, telephone, mail, email                                                                              |                      |
| Sample size                                    | 12       | How many participants were in the study?                                                                                                                 |                      |
| Non-participation                              | 13       | How many people refused to participate or dropped out? Reasons?                                                                                          |                      |
| <i>Setting</i>                                 |          |                                                                                                                                                          |                      |
| Setting of data collection                     | 14       | Where was the data collected? e.g. home, clinic, workplace                                                                                               |                      |
| Presence of non-participants                   | 15       | Was anyone else present besides the participants and researchers?                                                                                        |                      |
| Description of sample                          | 16       | What are the important characteristics of the sample? e.g. demographic data, date                                                                        |                      |
| <i>Data collection</i>                         |          |                                                                                                                                                          |                      |
| Interview guide                                | 17       | Were questions, prompts, guides provided by the authors? Was it pilot tested?                                                                            |                      |
| Repeat interviews                              | 18       | Were repeat interviews carried out? If yes, how many?                                                                                                    |                      |
| Audio/visual recording                         | 19       | Did the research use audio or visual recording to collect the data?                                                                                      |                      |
| Field notes                                    | 20       | Were field notes made during and/or after the interview or focus group?                                                                                  |                      |
| Duration                                       | 21       | What was the duration of the interviews or focus group?                                                                                                  |                      |
| Data saturation                                | 22       | Was data saturation discussed?                                                                                                                           |                      |
| Transcripts returned                           | 23       | Were transcripts returned to participants for comment and/or                                                                                             |                      |

| Topic                                  | Item No. | Guide Questions/Description                                                                                                        | Reported on Page No. |
|----------------------------------------|----------|------------------------------------------------------------------------------------------------------------------------------------|----------------------|
|                                        |          | correction?                                                                                                                        |                      |
| <b>Domain 3: analysis and findings</b> |          |                                                                                                                                    |                      |
| <i>Data analysis</i>                   |          |                                                                                                                                    |                      |
| Number of data coders                  | 24       | How many data coders coded the data?                                                                                               |                      |
| Description of the coding tree         | 25       | Did authors provide a description of the coding tree?                                                                              |                      |
| Derivation of themes                   | 26       | Were themes identified in advance or derived from the data?                                                                        |                      |
| Software                               | 27       | What software, if applicable, was used to manage the data?                                                                         |                      |
| Participant checking                   | 28       | Did participants provide feedback on the findings?                                                                                 |                      |
| <i>Reporting</i>                       |          |                                                                                                                                    |                      |
| Quotations presented                   | 29       | Were participant quotations presented to illustrate the themes/findings?<br>Was each quotation identified? e.g. participant number |                      |
| Data and findings consistent           | 30       | Was there consistency between the data presented and the findings?                                                                 |                      |
| Clarity of major themes                | 31       | Were major themes clearly presented in the findings?                                                                               |                      |
| Clarity of minor themes                | 32       | Is there a description of diverse cases or discussion of minor themes?                                                             |                      |

Developed from: Tong A, Sainsbury P, Craig J. Consolidated criteria for reporting qualitative research (COREQ): a 32-item checklist for interviews and focus groups. *International Journal for Quality in Health Care*. 2007. Volume 19, Number 6: pp. 349 – 357

**Once you have completed this checklist, please save a copy and upload it as part of your submission. DO NOT include this checklist as part of the main manuscript document. It must be uploaded as a separate file.**

# BMJ Open

## Patient experience of long term recovery after open fracture of the lower limb: A qualitative study using interviews in a community setting

|                                 |                                                                                                                                                                                                                                                                                                                                                               |
|---------------------------------|---------------------------------------------------------------------------------------------------------------------------------------------------------------------------------------------------------------------------------------------------------------------------------------------------------------------------------------------------------------|
| Journal:                        | <i>BMJ Open</i>                                                                                                                                                                                                                                                                                                                                               |
| Manuscript ID                   | bmjopen-2019-031261.R1                                                                                                                                                                                                                                                                                                                                        |
| Article Type:                   | Original research                                                                                                                                                                                                                                                                                                                                             |
| Date Submitted by the Author:   | 14-Aug-2019                                                                                                                                                                                                                                                                                                                                                   |
| Complete List of Authors:       | Rees, Sophie; University of Warwick, Warwick Clinical Trials Unit<br>Tutton, Elizabeth; University of Warwick,<br>Achten, Juul; University of Oxford, NDORMS<br>Bruce, Julie; University of Warwick, Warwick Clinical Trials Unit<br>Costa, Matthew; University of Oxford, Nuffield Department of<br>Orthopaedics, Rheumatology, and Musculoskeletal Sciences |
| <b>Primary Subject Heading</b>: | Qualitative research                                                                                                                                                                                                                                                                                                                                          |
| Secondary Subject Heading:      | Surgery                                                                                                                                                                                                                                                                                                                                                       |
| Keywords:                       | QUALITATIVE RESEARCH, Orthopaedic & trauma surgery < SURGERY, REHABILITATION MEDICINE                                                                                                                                                                                                                                                                         |
|                                 |                                                                                                                                                                                                                                                                                                                                                               |

SCHOLARONE™  
Manuscripts

1  
2  
3 **Patient experience of long term recovery after open fracture of the lower limb: A**  
4  
5 **qualitative study using interviews in a community setting**  
6  
7

8 **Sophie Rees<sup>1</sup> \*Elizabeth Tutton<sup>1,2,3</sup>, Juul Achten<sup>2</sup>, Julie Bruce<sup>1</sup>, Matthew L. Costa<sup>2</sup>**  
9  
10

11  
12  
13 *<sup>1</sup>Warwick Medical School, University of Warwick, Gibbet Hill Campus, Coventry, CV4 8UW, UK*

14  
15 *<sup>2</sup>Oxford Trauma, Kadoorie Centre, Nuffield Department of Orthopaedics, Rheumatology and*  
16  
17 *Musculoskeletal Sciences, University of Oxford*

18  
19  
20 *<sup>3</sup>Oxford University Hospitals NHS Foundation Trust, John Radcliffe Hospital, OX3 9DU, UK*  
21

22 **Email addresses:** s.rees.1@warwick.ac.uk, \*e.tutton@warwick.ac.uk; julie.bruce@warwick.ac.uk,  
23  
24 juul.achten@ndorms.ox.ac.uk, matthew.costa@ndorms.ox.ac.uk  
25

26 **\*CORESPONDING AUTHOR**  
27

28 Elizabeth Tutton  
29

30 e.tutton@warwick.ac.uk  
31

32 liz.tutton@ndorms.ox.ac.uk  
33

34 Tel: 01865 223106  
35  
36

37 **Kadoorie Centre**  
38

39 **Level 3, John Radcliffe Hospital**  
40

41 **Oxford OX3 9DU**  
42  
43

44 **Word Count:** 4762  
45

46 **Keywords:** injury, recovery, open fracture, experience, qualitative, body image, self-identity  
47  
48

49 **ABSTRACT**  
50

51  
52 **Objectives:** Treatment of open fractures is complex and patients may require muscle and skin grafts. The aim  
53  
54 of this study was to gain a greater understanding of patient experience of recovery from open fracture of the  
55  
56 lower limb two to four years post-injury.  
57  
58  
59  
60

1  
2  
3 **Design:** A phenomenological approach was used to guide the design of the study. Interviews took place  
4  
5 between October 2016 and April 2017 in the participants' own homes or via telephone.  
6

7 **Setting:** England, UK.  
8

9 **Participants:** A purposive sample of 25 patients were interviewed with an age range of 26-80 years (median  
10  
11 51), 19 were male and six female, and time since injury was 24-49 months (median 35 months).  
12

13 **Results:** The findings identified a focus on struggling to recover as participants created a new way of living,  
14  
15 balancing moving forward with accepting how they are, whilst being uncertain of the future and experiencing  
16  
17 cycles of progress and setbacks. This was expressed through three themes: i) 'being disempowered' with the  
18  
19 emotional impact of dependency and uncertainty, ii) 'being changed' and living with being fragile and being  
20  
21 unable to move freely and iii) 'being myself' with a loss of self, feeling and looking different, alongside  
22  
23 recreation of self in which they integrated the past, present and future to find meaningful ways of being  
24  
25 themselves.  
26

27 **Conclusion:** This study identified the long-term disruption caused by serious injury, the hidden work of  
28  
29 integration that is required in order to move forward and maximise potential for recovery. Supportive  
30  
31 strategies that help people to self-manage their everyday emotional and physical experience of recovery from  
32  
33 injury are required. Research should focus on developing and testing effective interventions that provide  
34  
35 support and self-management within a holistic rehabilitation plan.  
36

## 37 38 **ARTICLE SUMMARY** 39

### 40 41 **Strengths and limitations of this study** 42

- 43 • Use of in-depth qualitative interviews has provided rich data and new insights into the hidden work  
44 undertaken by patients as they recover from major lower leg injury.  
45
- 46 • The variation and patterns within the patients' experience may help healthcare providers focus  
47 effective strategies to maximise emotional and physical recovery over the longer term.  
48
- 49 • Our study was intentionally exploratory in nature and the resulting framework requires further  
50 exploration in diverse samples to assess its transferability.  
51  
52  
53  
54  
55  
56  
57  
58  
59  
60

## INTRODUCTION

Open fractures of the lower limb (where the bone protrudes through the skin) occur in an estimated 30% of fractures of the tibia.<sup>[1]</sup> Treatment is complex as the wound requires surgical cleaning before fixation of the bone, often followed by muscle and skin grafting. The UK WOLLF Wound management of Open Lower Limb Fractures trial compared standard dressings with Negative Pressure Wound Therapy (NPWT).<sup>[2]</sup> Negative Pressure Wound Therapy is a type of dressing that applies a gentle suction to the wound removing excess fluid. Two qualitative sub-studies of this trial were undertaken to explore the lived experience of patients with an open fracture of the lower limb, firstly during hospitalisation, and secondly, this paper presents the findings from two to four years post-injury.

There is increasing evidence that the impact of open fracture of the lower limb can be life changing with prolonged periods of recovery. Embodied vulnerability conveys how patients with open fractures of the lower limb struggled to cope with their emotional distress, their changed body which included their wounds, body image, pain and the uncertain nature of their future life.<sup>[3]</sup> Recovery can be slow and patients can find it hard to return to their pre-injury lives even 2 years after an open fracture.<sup>[4]</sup> Studies with a broader sample of injured patients identify the ongoing challenge of daily living, being able to work and body image.<sup>[5]</sup> There is also evidence of persisting psychological distress.<sup>[6]</sup> In order to provide direction for long term support and rehabilitation this qualitative study develops existing knowledge by exploring the research question, what are patients' experiences of recovery from an open fracture of the lower limb two to four years post injury?

## METHODS

This study was informed by phenomenology and the work of Heidegger<sup>[7]</sup> used in other studies of injury.<sup>[8,9]</sup> This enabled participants to share their experience of everyday life within their social and cultural context. It uncovered insights into how they know and understand their world and what is important to them. Immersion in the data and interpretation led to an understanding of the meanings inherent in the everyday world of the participant. The project was given ethical approval by West Midlands Coventry and Warwickshire Research Ethics Committee (REC Reference: 12/WM/0001) in June 2016.

A purposive sample of 25 participants were recruited between October 2016 and April 2017, during routine follow up. Interviewees were participants in the UK WOLLF trial<sup>[2]</sup> and had received reconstructive surgery for

1  
2  
3 an open fracture to the lower limb. Purposive sampling included a range of sex, age and grade of severity of  
4  
5 injury. A key eligibility criteria for the UK WOLLF trial was that at the end of the first surgical wound  
6  
7 debridement the wound could not be closed. This was required for the trial, as the NPWT dressings under  
8  
9 investigation cannot be applied to closed wounds, but does not fit clearly with the existing classification  
10  
11 systems. Only patients with a higher grade of open fracture were included where skin or muscle grafts are  
12  
13 required. Three sub-divisions of the Gustilo and Anderson<sup>[10]</sup> classification were used, grade II, grade III or  
14  
15 grade III with a vascular injury. See table 1 for information on the participants' sex, age, time since injury,  
16  
17 cause of injury and injury severity. Two people approached chose not to take part due to personal  
18  
19 circumstances and lack of time. Respondents received a patient information sheet and provided written or oral  
20  
21 consent to take part in an interview. The interviews focused on the participants' lived experience of recovery  
22  
23 from injury and were lightly structured to cover their thoughts, feelings, activities, function and work. Open  
24  
25 questions such as 'what has it been like for you since your injury', with prompts such as 'tell me more about  
26  
27 that', 'how did that feel', were used to enable participants to share their experience. Two female health  
28  
29 researchers with PhDs who did not know the participants undertook the interviews (SR (n=15) and ET (n=10)),  
30  
31 either face-to-face (usually at the participant's own home, once at a nearby hospital) or over the telephone.  
32  
33 Two participants were accompanied by their partners. Care was taken to support participants and respect  
34  
35 their privacy and dignity. One interviewer had experience of interviewing patients with cancer and a  
36  
37 background in medical sociology, the other had prior experience of interviewing patients with traumatic  
38  
39 orthopaedic injuries. Interviews lasted 25-100 minutes (average 60 minutes) and were digitally audio-recorded  
40  
41 and transcribed verbatim. Data was anonymised and held on secure password protected University  
42  
43 computers. None of the participants wished to see a copy of their transcript.  
44  
45  
46  
47

48  
49 Table 1 Information about the participants

| <b>Table 1 Information about participants</b> |                               |
|-----------------------------------------------|-------------------------------|
| <b>Characteristics</b>                        | <b>Number of participants</b> |
| Sex                                           |                               |
| Male                                          | 19                            |
| Female                                        | 6                             |

|                                                             |    |
|-------------------------------------------------------------|----|
| <b>Age (years) mean 51, range 26-80</b>                     |    |
| 18-29                                                       | 4  |
| 30-49                                                       | 8  |
| 50-69                                                       | 9  |
| 70-80                                                       | 4  |
| <b>Time since injury (months) mean 31, range 24-49</b>      |    |
| 24-35 months                                                | 14 |
| 36-49 months                                                | 11 |
| <b>Cause of Injury</b>                                      |    |
| Car collision                                               | 8  |
| Motorbike collision                                         | 5  |
| Pedestrian-vehicle collision                                | 3  |
| Fall from height/stairs                                     | 3  |
| Crush injury at work                                        | 3  |
| Low energy fall (from standing)                             | 2  |
| Bicycle-vehicle collision                                   | 1  |
| <b>Injury severity, Gustilo and Anderson classification</b> |    |
| II                                                          | 4  |
| III                                                         | 18 |
| III plus vascular injury                                    | 3  |

#### Patient and Public Involvement

Patient and public involvement (PPI) was integral to the design and conduct of the UK WOLFF study. Four patients with similar injuries who were members of the UK WOLFF PPI group helped the researchers reflect on their interpretations during analysis. The UK Musculoskeletal Trauma PPI group are involved in dissemination of the findings.

#### Analysis

1  
2  
3 Analysis was undertaken by two researchers (SR and ET), was an iterative process involving initial coding of  
4 sections of the data to label the underlying meaning or 'what is going on' in the data such as 'feeling sad due  
5 to lack of progress'. Codes were collected together with other similar codes to create categories such as 'being  
6 uncertain'. Differences and challenges within interviews and across interviews were written up in field notes  
7 and memos, and discussed. Categories were collected together to create themes or 'structures of  
8 experience'<sup>[11]</sup> such as 'being disempowered'. NVivo 11 a qualitative software package was used to manage  
9 the data (QSR Warrington, UK). The findings were shared with the broader research team. Differences in  
10 interpretation were discussed as part of the process of analysis but in general there was agreement about the  
11 nature and content of the three themes.

12  
13 Rigour was demonstrated through trustworthiness.<sup>[12]</sup> Both researchers were engaged with the data, held  
14 regular discussions and reflected on their positionality throughout analysis. Auditability was demonstrated  
15 through the identification of themes and categories and use of quotes to illustrate them. Saturation of themes  
16 and categories was achieved. This was indicated when no new themes or categories developed after 18  
17 patients were interviewed. Interviewing continued to ensure the sample was purposeful and there was a range  
18 of codes in each category. Resonance with the findings was identified by four patients from the UK WOLLF PPI  
19 group. It was noted that they placed emphasis on existing codes that identified challenges with intimacy and  
20 gratefulness for care provided. A workshop including a range of multidisciplinary staff representing nursing,  
21 physiotherapy, trauma surgeons, plastic surgeons and psychologists suggested the findings reflected their  
22 experience of listening to patients in clinical practice, although they held differing perspectives on the degree  
23 of importance of items and labelling of codes. For example they felt some codes could be drawn together  
24 under the broader labels of anxiety or depression.

## 25 26 27 28 29 30 31 32 33 34 35 36 37 38 39 40 41 42 43 44 45 46 47 **RESULTS**

48  
49 Overarching theme: Struggling to recover

50  
51  
52 The findings convey the overarching theme of 'struggling to recover' as an experiential process in which  
53 participants aim to make sense of their injury, balance striving to move forward with accepting how they are,  
54 and find meaningful ways of living whilst being uncertain of the future and experiencing cycles of progress and  
55 setbacks.  
56  
57  
58  
59  
60

1  
2  
3  
4  
5  
6 In struggling to recover participants conveyed that their 'taken for granted' ways of living experienced prior to  
7  
8 injury were replaced with daily challenge as they endured symptoms such as persistent pain. They often hid  
9  
10 the struggle to keep going to maximise participation and maintain a sense of progression.

11  
12 They can see people walking but there is no light or pain-meter on top of the head that says 'this guy  
13  
14 is in absolute agony but he's not going to stop walking because he doesn't want to go in a mobility  
15  
16 scooter'. People look at you and say 'You're getting on great aren't you?' All you really just want to  
17  
18 say to them is 'Every day I struggle' and some days you just want to sit and cry your eyes out. – P13

19  
20  
21 Loss caused by injury led participants to re-negotiate how they live and to integrate their past and present self  
22  
23 into new ways of being. This was portrayed through the themes of being disempowered, being changed, and  
24  
25 being myself.

#### 26 27 28 Theme 1: Being disempowered

29  
30 Being disempowered conveyed the emotional and physical impact on participants of loss of personal control  
31  
32 over their life and was expressed through the categories 'being dependent on others' and 'being uncertain  
33  
34 about the future'.

#### 35 36 37 *Being dependent on others*

38  
39 Being dependent on others was a process of accepting help from others whilst striving to maintain a sense of  
40  
41 independence through activities that supported their mental and physical wellbeing. Many participants had  
42  
43 prolonged periods where they were not able to put weight through their injured leg, and some had injuries to  
44  
45 both legs. Dependency on others created frustration, boredom, distress, dismay, was undignified, lowered  
46  
47 their mood and was epitomised by not even being able to perform simple tasks, such as to make a cup of tea.

48  
49 I don't know if it's a man thing or male thing, I don't know. It's your dignity, I mean the last person  
50  
51 who wiped my arse was my mum and that's it, or my dad, but being a grown man using a bed pan  
52  
53 because I couldn't get out of bed was awful. – P06

54  
55  
56 In this state of profound dependency their body became central to everyday life, its needs and limitations  
57  
58 explicitly governing every aspect of everyday life.  
59  
60

1  
2  
3 You feel a bit like a passenger in it all because you're on the outside looking in and you think you're  
4 being a bit of a burden on everyone. At the time I found it quite hard to almost tell people that's how  
5 I felt, I feel this, I feel a bit worthless. – P18  
6  
7  
8  
9

10 Constant support for daily bodily needs could lower their mood so that they could no longer see the 'light at  
11 the end of the tunnel' (P17) evident in suicidal thoughts.  
12  
13

14 I thought about topping myself because it's like I've been independent all my life. ... One night I had  
15 all the tablets, Tramadol. – P06  
16  
17  
18

19 Dependency on others was a disempowering experience that led to emotional vulnerability. Expressing how  
20 they felt was challenging in the context of being grateful for the care they had received and some had suicidal  
21 thoughts.  
22  
23  
24

### 25 *Being uncertain about the future*

26  
27

28 Being uncertain about the future conveyed the emotional impact of not knowing their potential degree of  
29 recovery, and what life would be like in the future. Being uncertain about their future added to participants'  
30 sense of disempowerment. Participants found it hard to imagine walking properly or returning to pre-injury  
31 activities and a 'wait and see' approach added to their sense of uncertainty.  
32  
33  
34  
35

36 I would say that was the toughest part, was just the un-endingness of it, it was just constant and it  
37 was horrible. – P19  
38  
39  
40

41 I did think in my mind you know 'it will heal and then I've got rehabilitation' but this whole non-union,  
42 it just dragged on and on and on, I couldn't see an end. ... I wished I'd known about the non-union,  
43 err, it was almost hidden from me. ... I said 'well I thought that the operation was successful?' then he  
44 told me 'well it was because we would've cut your leg off years ago'. – P21  
45  
46  
47  
48  
49

50 There was a degree of anxiety regarding their future and ability to live and work productively.  
51  
52

53 You want to live for the future now because that's what you've got in front of you but you worry  
54 about what it's going to bring, not only physically but financially as well. You have no idea what your  
55 pay-out is going to be and so my life is in somebody else's hands. There is that horrible thought that  
56  
57  
58  
59  
60

1  
2  
3 you may have to go back out to work, force yourself to work because financially you can't exist for the  
4  
5 rest of your life. – P13  
6  
7

8 Their capacity to heal often determined their future; leaving them feeling uncertain, disempowered and  
9  
10 anxious. This was exacerbated by setbacks such as non-union (also noted in recreating me) that reduced their  
11  
12 ability to sustain recovery.  
13

#### 14 Theme 2: Being changed

15  
16 Being changed identified how their body no longer looks, feels or functions in ways it had previously. Everyday  
17  
18 life involved a process of re-negotiating where participants learnt through experience what they could do and  
19  
20 how they felt about their body whilst striving to regain and retain normal activities. It was expressed through  
21  
22 the categories of being fragile and being unable to move freely.  
23

#### 24 *Being fragile*

25  
26 Being fragile conveyed a sense of their body as looking and feeling less robust, less trustworthy, less reliable  
27  
28 and active engagement was required to reconnect in a positive way with their changed body. Participants were  
29  
30 predominantly young or middle-aged adults, and many had been previously fit and active individuals. They  
31  
32 now felt their body was older, weaker, and more fragile.  
33  
34

35  
36 I can't dig. ... I feel like I've got a weakness which has left me feeling like I've got a bit of a disability. –  
37

38 P21  
39

40  
41 Participants felt a need to protect their injured body, or at least the injured limb, including avoiding activities  
42  
43 due to the fear of experiencing another injury.  
44

45 You're frightened it's gonna (going to) break again. – P02  
46  
47

48 The sense of a whole, continuous body which the participants felt they could trust to do the activities they  
49  
50 wanted to do was disturbed and instead participants could experience their bodies as alien and fragile.  
51

52  
53 I do go running and I wear long running trousers because I think if I see it (the muscle graft) it makes  
54  
55 me feel like there's a weakness there and it makes me very aware, I don't think it is any weaker the  
56  
57 leg but mentally it makes me think it's a bit weaker and I just find it distracting as well if I exercise it. I  
58  
59 probably would be over-cautious and not really exercise it properly if I could see it I think. – P14  
60

1  
2  
3 Some participants described feeling distanced or alienated from the injured part of their body.  
4

5  
6 I don't look at it as my leg anymore. ... It is like the legs belongs to somebody else they don't  
7  
8 particularly belong to me. – P19  
9

10 Their injured body part was no longer fully integrated into their perception of their body. Parts of their body  
11  
12 had literally shifted places as skin/muscle from other areas of the body had been transplanted to cover the  
13  
14 defect in the leg. Pain and numbness could increase this sense of alienation.  
15

16  
17 Participants hid or covered up their injured leg, to avoid others perceiving them as fragile, less capable or  
18  
19 weak. For some participants the struggle with healing, pain and lack of mobility was so exhausting, that they  
20  
21 thought amputation might improve their chances of mobility and a better quality of life.  
22

23  
24 There were a couple of times in it all when I thought, would it be better off to say take it off but I  
25  
26 knew how hard and how much effort people had put in to make sure that leg was staying where it  
27  
28 was. – P18  
29

30  
31 If you took me back in time and I knew then what I know now I would have said 'take my leg off now'.  
32  
33 I'd be four years down the line with a prosthetic and I could probably still be working. – P13  
34

35 Being fragile highlighted the unreliability of their body and continued vulnerability to further injury. The sense  
36  
37 of a 'whole' body could be disrupted and amputation was considered in an effort to improve chances of  
38  
39 recovery.  
40

#### 41 42 *Being unable to move freely* 43

44  
45 Being unable to move freely was the loss of ease, fluidity and previously taken-for-granted ways of moving, it  
46  
47 affected their ability to use certain geographical spaces and effort was required to improve levels of physical  
48  
49 activity. Despite being between two to four years post injury, participants felt they were not able to move with  
50  
51 the same fluidity or spontaneity. The way they walked, their pace, gait or balance was different.  
52

53  
54 I can't move fast anymore. – P17  
55

56  
57 My balance was all over the place, it still is, sometimes I feel like I'm falling to the side, it's a weird  
58  
59 feeling. – P01  
60

1  
2  
3 I waddle, I walk like a penguin it's the only way I can balance, sort of putting weight on one foot and  
4  
5 then going over to the next foot, I can't stride out anymore. – P02  
6

7  
8 Specific activities such as being able to kneel prevented them from moving as freely. Some participants felt the  
9  
10 area where they had a soft tissue/muscle flap used in reconstructive surgery was heavy (notable when  
11  
12 sleeping), or they experienced swelling and pain. Persistent pain reduced their ability to move and join in  
13  
14 activities, it varied in type and duration but sometimes was prolonged and often unpredictable.  
15

16  
17 I sit down for an hour and I get up, oh the pain you can't describe it, but I mean it's for seconds but  
18  
19 it's enough to, it's really, really painful. – P02  
20

21  
22 Participants experienced restrictions on the spaces and places they felt confident occupying. They were  
23  
24 worried about falling and injuring themselves again. The terrain underfoot, types of floor or ground could  
25  
26 cause pain leading them to be constantly vigilant.  
27

28  
29 Participants felt changed, even if they had returned to work, often with an increased sense of fragility, loss of  
30  
31 fluidity and pace of movement, combined with specific functional losses. They hid this fragility from others,  
32  
33 undertook additional planning for daily activities, limited social participation and changed their work roles in  
34  
35 order to cope with their injury.  
36

### 37 Theme 3: Being myself

38  
39 Being myself was an active process of integrating injury into their sense of who they were as a person, bringing  
40  
41 together the past, present and future. It was expressed through loss of self and 'recreating me'. Participants  
42  
43 worked to integrate their injury into their lives expressed through 'loss of self' and 'recreating me'.  
44

#### 45 *Loss of self*

46  
47  
48 Loss of self was expressed as participants felt and looked different and were unable to fulfil their normal roles  
49  
50 and activities as they did prior to their injury. In loss of self, there was a sense that the body 'restricts me from  
51  
52 being me' and participants had to adapt to being different from their pre-injury state.  
53

54  
55 It seemed like a part of my life stopped at 6.45 on (date of injury) and a new life started. ... I used to  
56  
57 think nothing of walking ten to fifteen miles a day along disused railway lines and things like that, we  
58  
59 were avid walkers. – P04  
60

1  
2  
3 Participants' current experience contradicted their memories of who they were.  
4  
5

6 I have 55 years' worth of memories inside my head so you think 'Oh I used to go running on a  
7  
8 Saturday morning'. ... You try and be the person you were before and you can't be because you are  
9  
10 95% of what you used to be. But it's just that 5% area that causes you 100% of the problems. – P13  
11  
12 Some days I, I could scream. I wake in the morning and 'cause you forget', you know when you go to  
13  
14 sleep, and I wake up in the morning thinking I can just jump out of bed and I can't and then it hits you  
15  
16 and you think 'Oh God I can't do this!' – P02  
17  
18

19 Their body thwarted their attempts to return to their former selves. Despite regaining their independence and  
20  
21 feeling that their healthcare team considered them to be recovered, the participants were continually  
22  
23 reminded of their injured bodies.  
24  
25

26 It's very difficult to have a day where you are not conscious of 'that hurts'. ... In an active way you are  
27  
28 kind of constantly reminded because it's never quite the same day to day. – P22  
29  
30

31 In contrast to younger patients, older participants located the injury within the context of prior conditions and  
32  
33 they did not experience the same degree of challenge to their identity.  
34  
35

36 The event (which) bears more on how I think about life in general is having been fortunate to survive  
37  
38 a heart attack ten years ago. ... So that sort of in a way puts things in perspective. I know falling off a  
39  
40 roof can initially be thought of as a life-threatening event but a cardiac arrest is definitely a life-  
41  
42 threatening event! – P08  
43  
44

45 Participants struggled with the loss of their pre-injured self and the activities that defined them. Despite  
46  
47 attempts to move forward and integrate with the present they found their unreliable body provided sensory  
48  
49 reminders of their loss and their injury.  
50

### 51 *Recreating me*

52

53 Recreating me referred to the ways in which participants made sense of their altered selves, worked on their  
54  
55 body and mind to find meaningful ways of being and living. In making sense of their injury they reflected on  
56  
57 how life had been and tried to reconcile this with how they felt now.  
58  
59  
60

1  
2  
3 It did come as a revelation about three weeks ago, just you know, I can't carry on doing this, I can't  
4 keep pushing to get my life back, it's got you know, I've got to change, you know it is a bit of a shock!  
5  
6 – P19  
7  
8  
9

10 I used to think 'I wished the thing had never fallen on me!' but now I think I've got to that stage where  
11 I've passed that and I think I have just slipped, probably slipped back into normality if, um, I, I sort of  
12 lived with this problem and that's then become me, so maybe you adapt. – P21  
13  
14  
15

16 Participants tried to return to usual activities but recovery was characterised by ups and downs. Some felt  
17 their recovery was delayed by further injuries described by participants as stress fractures, snapped (torn)  
18 hamstrings (muscles at the back of the thigh), or injury to their iliotibial bands (connective tissue running from  
19 the pelvis to the knee). Only a small number of participants reported receiving enough physiotherapy after  
20 their injury. Those who received physiotherapy (usually privately), described a more purposeful recovery with  
21 fewer examples of setbacks and less uncertainty.  
22  
23  
24  
25  
26  
27

28  
29 I think she took it upon herself to get me back to where I wanted to be and I think she listened to  
30 what I wanted out of life. – P18  
31  
32  
33

34 Some participants expressed gratitude to be alive or to have avoided amputation. They tried to locate meaning  
35 in what happened to them.  
36  
37

38 I went back and met another patient and his family and I hope that I gave them a little bit more hope.  
39  
40 ... It was good for me as well for my rehabilitation to feel that it wasn't all for nothing. – P18  
41  
42

43 For these participants, they were able to find meaning in their injury, and so to incorporate it into their  
44 biography, or their story of themselves. Participants engaged in 'body work' in order to convey a sense of  
45 normality and provide the appearance of a non-injured body. However, often participants described struggling  
46 with the difference between others' expectations and the reality of their everyday experience.  
47  
48  
49

50  
51 I think when people think you're doing so well physically they just think 'she's doing really well' and  
52 you almost don't want to turn around and say 'well actually I'm really struggling with this, that and  
53 the other' because I just don't want to disappoint people or turn it into a negative thing. – P14  
54  
55  
56  
57  
58  
59  
60

1  
2  
3 In recreating me the participants were hindered by their injured body and a lack of supportive therapies but  
4  
5 tried to integrate their past and present self-identity. New opportunities and meaningful ways of living that  
6  
7 were beneficial could be found. There was a strong desire to appear normal and participants struggled to be  
8  
9 themselves.

## 11 **DISCUSSION**

12  
13  
14 This qualitative study adds to recent research on the patient experience of open fractures of the lower limb in  
15  
16 acute care<sup>[3,9]</sup> and post injury<sup>[4]</sup> by identifying the ongoing recovery undertaken by patients to process the  
17  
18 impact of injury on their sense of being disempowered, being changed and being myself. We have specifically  
19  
20 focussed on the longer-term (two to four year post-injury) impact of these injuries and especially in those  
21  
22 patients who were identified as having injuries on the 'severe' end of the spectrum. We found that the  
23  
24 concept of embodied vulnerability,<sup>[3,9]</sup> and endurance in early recovery<sup>[8]</sup>, clearly identified in acute care, also  
25  
26 extends into the longer-term as participants struggle to recover, processing their loss, working to negotiate  
27  
28 how they live and integrate changes within their self-identity. Our findings indicate that longer term clinical  
29  
30 support is required to improve outcomes for mental health, function, management of pain and living with  
31  
32 disability in patients with major trauma to the lower limbs.

33  
34  
35 There were some limitations to our study. The sample was limited to those taking part in the UK WOLLF trial  
36  
37 and participants may have different attributes to those who decline to take part in a clinical trial and be  
38  
39 interviewed. Those agreeing to take part in an interview up to four years after injury may be less likely to  
40  
41 consider themselves as recovered, thus be more representative of those with chronic ongoing problems. The  
42  
43 sample was also not ethnically diverse and sampling at specific time points during recovery may have  
44  
45 increased the transferability of the study findings to other populations. However the UK WOLLF sample were  
46  
47 considered to be representative of the general population with severe open fractures.<sup>[2]</sup> Our sample was  
48  
49 purposive within the UK WOLLF population and saturation of data was achieved. Four patients with similar  
50  
51 injuries (UK WOLLF PPI group) felt their personal experience resonated with the findings of this study however  
52  
53 they also highlighted the joy of recovery, gratefulness to staff for their care, the similarity of the findings to,  
54  
55 but also the difference from, their individual experience. Despite these limitations, this study provides  
56  
57 evidence that patients who suffered the more severe injuries may benefit from enhanced clinical attention  
58  
59 that focusses on distress, uncertainty, fragility and body image over a prolonged period of time. Psychological  
60

1  
2  
3 distress<sup>[6,13]</sup> is present in this group and may be linked to ongoing disability.<sup>[14]</sup> The continued uncertainty that  
4 patients feel reflects elements of a chaos narrative (Frank 1995), where loss of control means it is hard to find  
5 meaning in daily life. In our study despair, noted in recovery from trauma <sup>[15]</sup> was expressed as suicidal  
6 thoughts. Their perceptions of the body as fragile and weak suggest a state of dys-embodiment<sup>[16]</sup> <sup>[17]</sup> where  
7 dysfunction highlights the loss of normal taken for granted ways of being. Ongoing disruption to body image is  
8 noted in studies of stigma and disfigurement<sup>[18]</sup> and in societal pressure to appear recovered<sup>[19]</sup> and  
9 attractive.<sup>[20]</sup> In this study, amputation was considered as an alternative solution to continued challenges and  
10 dissociation from the body occurred, as in other specialities.<sup>[21]</sup> Patients' progression towards integration of  
11 physical change and self-identity was hindered by reminders of their injury, such as persistent pain, as their  
12 unreliable body<sup>[22]</sup> was unable to achieve the intended activity. This process is noted in chronic illness<sup>[23]</sup> and  
13 major trauma patients three to six months post injury.<sup>[24]</sup> Support that enables patients to feel a greater sense  
14 of empowerment and integrate bodily changes within their self-identity may be helpful. Research should  
15 therefore focus on developing and testing effective interventions that provide longer term support and self-  
16 management within a holistic rehabilitation plan.

## 31 32 **STATEMENTS**

### 33 34 **Funding statement**

35 This work was supported by the UK National Institute for Health Research, Health Technology Assessment  
36 (HTA) Programme (project number 10/57/20) and was supported by the National Institute for Health Research  
37 (NIHR) Oxford Biomedical Centre.

### 38 39 **Competing interests**

40 No benefits have been received or will be received from a commercial party related directly or indirectly to the  
41 subject of this article.

### 42 43 **Acknowledgements**

44 The authors would like to thank all the patients who generously gave their time and energy to support this  
45 study. In addition we would like to thank the PPI participants and staff who facilitated aspects of this study  
46 particularly Chris Bouse.

### Author contributions

SR and ET contributed equally to this paper. The design, data collection, analysis and drafting of the paper were jointly undertaken by SR and ET. The team JA, JB, MC supported the project, were involved in discussion of the findings and the development of this paper.

### Ethical approval

The project was given ethical approval by West Midlands Coventry and Warwickshire Research Ethics Committee (REC Reference: 12/WM/0001) in June 2016.

### Consent and Confidentiality

All participants received an information sheet and at least 24 hours to consider their participation. Written informed consent or verbal consent over the telephone were obtained.

### Check list

The checklist has been completed and submitted.

### Data sharing statement

We do not have consent for data sharing from the study participants.

### Exclusive License

The Submitting Author accepts and understands that any supply made under these terms is made by BMJ to the Submitting Author unless you are acting as an employee on behalf of your employer or a postgraduate student of an affiliated institution which is paying any applicable article publishing charge ("APC") for Open Access articles. Where the Submitting Author wishes to make the Work available on an Open Access basis (and intends to pay the relevant APC), the terms of reuse of such Open Access shall be governed by a Creative Commons licence – details of these licences and which [Creative Commons](#) licence will apply to this Work are set out in our licence referred to above.

### REFERENCES

1. Court-Brown C, Bugler KE, Clement ND, et al. The epidemiology of open fractures in adults. A 15-year review. *Injury* 2012;43(6):891-97.

- 1
- 2
- 3 2. Costa ML, Achten J, Bruce J, et al. Effect of Negative Pressure Wound Therapy vs Standard Wound
- 4 Management on 12-Month Disability Among Adults With Severe Open Fracture of the Lower
- 5 Limb: The WOLFF Randomized Clinical Trial. *JAMA* 2018;319(22):2280-88. doi:
- 6 10.1001/jama.2018.6452
- 7
- 8 3. Tutton E, Achten J, Lamb SE, et al. A qualitative study of patient experience of an open fracture of
- 9 the lower limb during acute care. *Bone Joint J* 2018;100-B(4):522-26. doi: 10.1302/0301-
- 10 620X.100B4.BJJ-2017-0891.R1
- 11
- 12 4. Trickett R, Mudge E, Price P, et al. A qualitative approach to recovery after open tibial fracture: the
- 13 road to a novel, patient-derived recovery scale. *Injury* 2012;43(7):1071-78.
- 14
- 15 5. McPhail SM, Dunstan J, Canning J, et al. Life impact of ankle fractures: qualitative analysis of
- 16 patient and clinician experiences. *BMC musculoskeletal disorders* 2012;13(1):224.
- 17
- 18 6. McCarthy ML, MacKenzie EJ, Edwin D, et al. Psychological distress associated with severe lower-
- 19 limb injury. *JBJS* 2003;85(9):1689-97.
- 20
- 21 7. Heidegger M. *Being and Time*. Oxford: Blackwell Publishing Ltd 1962.
- 22
- 23 8. Keene DJ, Mistry D, Nam J, et al. The Ankle Injury Management (AIM) trial: a pragmatic,
- 24 multicentre, equivalence randomised controlled trial and economic evaluation comparing
- 25 close contact casting with open surgical reduction and internal fixation in the treatment of
- 26 unstable ankle fractures in patients aged over 60 years. *Health Technol Assess*
- 27 2016;20(75):1-158. doi: 10.3310/hta20750
- 28
- 29 9. Costa ML, Achten J, Bruce J, et al. Negative-pressure wound therapy versus standard dressings for
- 30 adults with an open lower limb fracture: the WOLFF RCT. *Health Technol Assess*
- 31 2018;22(73):1-162. doi: 10.3310/hta22730 [published Online First: 2018/12/24]
- 32
- 33 10. Gustilo RB, Anderson JT. Prevention of infection in the treatment of one thousand and twenty-
- 34 five open fractures of long bones: retrospective and prospective analyses. *J Bone Joint Surg*
- 35 *Am* 1976;58(4):453-8.
- 36
- 37 11. Van Manen M. *Researching Lived Experience, human science for an action sensitive pedagogy*.
- 38 Albany: State University of New York Press 1990.
- 39
- 40 12. Lincoln YS, Guba E. *Naturalistic Inquiry*. Newbury Park, California: Sage Publications Inc 1985.
- 41
- 42 13. Bryant RA, O'Donnell ML, Creamer M, et al. The psychiatric sequelae of traumatic injury. *Am J*
- 43 *Psychiatry* 2010;167(3):312-20. doi: 10.1176/appi.ajp.2009.09050617
- 44
- 45 14. Crichlow RJ, Andres PL, Morrison SM, et al. Depression in orthopaedic trauma patients.
- 46 Prevalence and severity. *J Bone Joint Surg Am* 2006;88(9):1927-33. doi:
- 47 10.2106/JBJS.D.02604
- 48
- 49 15. Tutton E, Seers K, Langstaff D. Hope in orthopaedic trauma: a qualitative study. *Int J Nurs Stud*
- 50 2012;49(7):872-9. doi: 10.1016/j.ijnurstu.2012.01.013
- 51
- 52 16. Leder D. *The absent body*: University of Chicago Press 1990.
- 53
- 54 17. Williams SJ. The vicissitudes of embodiment across the chronic illness trajectory. *Body & Society*
- 55 1996;2(2):23-47.
- 56
- 57 18. Rumsey N, Harcourt D. Body image and disfigurement: issues and interventions. *Body Image*
- 58 2004;1(1):83-97. doi: 10.1016/S1740-1445(03)00005-6
- 59
- 60 19. Rees S. A qualitative exploration of the meaning of the term "survivor" to young women living
- with a history of breast cancer. *Eur J Cancer Care (Engl)* 2018;27(3):e12847. doi:
- 10.1111/ecc.12847 [published Online First: 2018/04/10]
20. Nuffield Council on Bioethics. *Cosmetic procedures*, 2017.
21. Thorpe G, McArthur M, Richardson B. Bodily change following faecal stoma formation:
- qualitative interpretive synthesis. *J Adv Nurs* 2009;65(9):1778-89. doi: 10.1111/j.1365-
- 2648.2009.05059.x
22. Kvigne K, Kirkevold M. Living with bodily strangeness: women's experiences of their changing and
- unpredictable body following a stroke. *Qual Health Res* 2003;13(9):1291-310.
23. Charmaz K. The body, identity, and self. *The Sociological Quarterly* 1995;36(4):657-80.

- 1  
2  
3 24. Claydon JH, Robinson L, Aldridge SE. Patients' perceptions of repair, rehabilitation and recovery  
4 after major orthopaedic trauma: a qualitative study. *Physiotherapy* 2017;103(3):322-29. doi:  
5 10.1016/j.physio.2015.11.002  
6  
7  
8  
9  
10  
11  
12  
13  
14  
15  
16  
17  
18  
19  
20  
21  
22  
23  
24  
25  
26  
27  
28  
29  
30  
31  
32  
33  
34  
35  
36  
37  
38  
39  
40  
41  
42  
43  
44  
45  
46  
47  
48  
49  
50  
51  
52  
53  
54  
55  
56  
57  
58  
59  
60

For peer review only

## COREQ (CONsolidated criteria for REporting Qualitative research) Checklist

A checklist of items that should be included in reports of qualitative research. You must report the page number in your manuscript where you consider each of the items listed in this checklist. If you have not included this information, either revise your manuscript accordingly before submitting or note N/A.

| Topic                                          | Item No. | Guide Questions/Description                                                                                                                              | Reported on Page No. |
|------------------------------------------------|----------|----------------------------------------------------------------------------------------------------------------------------------------------------------|----------------------|
| <b>Domain 1: Research team and reflexivity</b> |          |                                                                                                                                                          |                      |
| <i>Personal characteristics</i>                |          |                                                                                                                                                          |                      |
| Interviewer/facilitator                        | 1        | Which author/s conducted the interview or focus group?                                                                                                   |                      |
| Credentials                                    | 2        | What were the researcher's credentials? E.g. PhD, MD                                                                                                     |                      |
| Occupation                                     | 3        | What was their occupation at the time of the study?                                                                                                      |                      |
| Gender                                         | 4        | Was the researcher male or female?                                                                                                                       |                      |
| Experience and training                        | 5        | What experience or training did the researcher have?                                                                                                     |                      |
| <i>Relationship with participants</i>          |          |                                                                                                                                                          |                      |
| Relationship established                       | 6        | Was a relationship established prior to study commencement?                                                                                              |                      |
| Participant knowledge of the interviewer       | 7        | What did the participants know about the researcher? e.g. personal goals, reasons for doing the research                                                 |                      |
| Interviewer characteristics                    | 8        | What characteristics were reported about the interviewer/facilitator? e.g. Bias, assumptions, reasons and interests in the research topic                |                      |
| <b>Domain 2: Study design</b>                  |          |                                                                                                                                                          |                      |
| <i>Theoretical framework</i>                   |          |                                                                                                                                                          |                      |
| Methodological orientation and Theory          | 9        | What methodological orientation was stated to underpin the study? e.g. grounded theory, discourse analysis, ethnography, phenomenology, content analysis |                      |
| <i>Participant selection</i>                   |          |                                                                                                                                                          |                      |
| Sampling                                       | 10       | How were participants selected? e.g. purposive, convenience, consecutive, snowball                                                                       |                      |
| Method of approach                             | 11       | How were participants approached? e.g. face-to-face, telephone, mail, email                                                                              |                      |
| Sample size                                    | 12       | How many participants were in the study?                                                                                                                 |                      |
| Non-participation                              | 13       | How many people refused to participate or dropped out? Reasons?                                                                                          |                      |
| <i>Setting</i>                                 |          |                                                                                                                                                          |                      |
| Setting of data collection                     | 14       | Where was the data collected? e.g. home, clinic, workplace                                                                                               |                      |
| Presence of non-participants                   | 15       | Was anyone else present besides the participants and researchers?                                                                                        |                      |
| Description of sample                          | 16       | What are the important characteristics of the sample? e.g. demographic data, date                                                                        |                      |
| <i>Data collection</i>                         |          |                                                                                                                                                          |                      |
| Interview guide                                | 17       | Were questions, prompts, guides provided by the authors? Was it pilot tested?                                                                            |                      |
| Repeat interviews                              | 18       | Were repeat interviews carried out? If yes, how many?                                                                                                    |                      |
| Audio/visual recording                         | 19       | Did the research use audio or visual recording to collect the data?                                                                                      |                      |
| Field notes                                    | 20       | Were field notes made during and/or after the interview or focus group?                                                                                  |                      |
| Duration                                       | 21       | What was the duration of the interviews or focus group?                                                                                                  |                      |
| Data saturation                                | 22       | Was data saturation discussed?                                                                                                                           |                      |
| Transcripts returned                           | 23       | Were transcripts returned to participants for comment and/or                                                                                             |                      |

| Topic                                  | Item No. | Guide Questions/Description                                                                                                        | Reported on Page No. |
|----------------------------------------|----------|------------------------------------------------------------------------------------------------------------------------------------|----------------------|
|                                        |          | correction?                                                                                                                        |                      |
| <b>Domain 3: analysis and findings</b> |          |                                                                                                                                    |                      |
| <i>Data analysis</i>                   |          |                                                                                                                                    |                      |
| Number of data coders                  | 24       | How many data coders coded the data?                                                                                               |                      |
| Description of the coding tree         | 25       | Did authors provide a description of the coding tree?                                                                              |                      |
| Derivation of themes                   | 26       | Were themes identified in advance or derived from the data?                                                                        |                      |
| Software                               | 27       | What software, if applicable, was used to manage the data?                                                                         |                      |
| Participant checking                   | 28       | Did participants provide feedback on the findings?                                                                                 |                      |
| <i>Reporting</i>                       |          |                                                                                                                                    |                      |
| Quotations presented                   | 29       | Were participant quotations presented to illustrate the themes/findings?<br>Was each quotation identified? e.g. participant number |                      |
| Data and findings consistent           | 30       | Was there consistency between the data presented and the findings?                                                                 |                      |
| Clarity of major themes                | 31       | Were major themes clearly presented in the findings?                                                                               |                      |
| Clarity of minor themes                | 32       | Is there a description of diverse cases or discussion of minor themes?                                                             |                      |

Developed from: Tong A, Sainsbury P, Craig J. Consolidated criteria for reporting qualitative research (COREQ): a 32-item checklist for interviews and focus groups. *International Journal for Quality in Health Care*. 2007. Volume 19, Number 6: pp. 349 – 357

**Once you have completed this checklist, please save a copy and upload it as part of your submission. DO NOT include this checklist as part of the main manuscript document. It must be uploaded as a separate file.**

# BMJ Open

## Patient experience of long term recovery after open fracture of the lower limb: A qualitative study using interviews in a community setting

|                                 |                                                                                                                                                                                                                                                                                                                                                          |
|---------------------------------|----------------------------------------------------------------------------------------------------------------------------------------------------------------------------------------------------------------------------------------------------------------------------------------------------------------------------------------------------------|
| Journal:                        | <i>BMJ Open</i>                                                                                                                                                                                                                                                                                                                                          |
| Manuscript ID                   | bmjopen-2019-031261.R2                                                                                                                                                                                                                                                                                                                                   |
| Article Type:                   | Original research                                                                                                                                                                                                                                                                                                                                        |
| Date Submitted by the Author:   | 09-Sep-2019                                                                                                                                                                                                                                                                                                                                              |
| Complete List of Authors:       | Rees, Sophie; University of Warwick, Warwick Clinical Trials Unit<br>Tutton, Elizabeth; University of Oxford<br>Achten, Juul; University of Oxford, NDORMS<br>Bruce, Julie; University of Warwick, Warwick Clinical Trials Unit<br>Costa, Matthew; University of Oxford, Nuffield Department of Orthopaedics, Rheumatology, and Musculoskeletal Sciences |
| <b>Primary Subject Heading</b>: | Qualitative research                                                                                                                                                                                                                                                                                                                                     |
| Secondary Subject Heading:      | Surgery                                                                                                                                                                                                                                                                                                                                                  |
| Keywords:                       | QUALITATIVE RESEARCH, Orthopaedic & trauma surgery < SURGERY, REHABILITATION MEDICINE                                                                                                                                                                                                                                                                    |
|                                 |                                                                                                                                                                                                                                                                                                                                                          |

SCHOLARONE™  
Manuscripts

1  
2  
3 **Patient experience of long term recovery after open fracture of the lower limb: A**  
4  
5 **qualitative study using interviews in a community setting**  
6  
7

8 **Sophie Rees<sup>1</sup> \*Elizabeth Tutton<sup>1,2,3</sup>, Juul Achten<sup>2</sup>, Julie Bruce<sup>1</sup>, Matthew L. Costa<sup>2</sup>**  
9  
10

11  
12  
13 *<sup>1</sup>Warwick Medical School, University of Warwick, Gibbet Hill Campus, Coventry, CV4 8UW, UK*

14  
15 *<sup>2</sup>Oxford Trauma, Kadoorie Centre, Nuffield Department of Orthopaedics, Rheumatology and*  
16  
17 *Musculoskeletal Sciences, University of Oxford*

18  
19  
20 *<sup>3</sup>Oxford University Hospitals NHS Foundation Trust, John Radcliffe Hospital, OX3 9DU, UK*  
21

22 **Email addresses:** s.rees.1@warwick.ac.uk, \*liz.tutton@ndorms.ox.ac.uk; julie.bruce@warwick.ac.uk,  
23  
24 juul.achten@ndorms.ox.ac.uk, matthew.costa@ndorms.ox.ac.uk  
25

26 **\*CORESPONDING AUTHOR**  
27

28 Elizabeth Tutton  
29

30 e.tutton@warwick.ac.uk  
31

32 \*liz.tutton@ndorms.ox.ac.uk  
33

34 Tel: 01865 223106  
35

36 Kadoorie Centre  
37

38 Level 3, John Radcliffe Hospital  
39

40 Oxford OX3 9DU  
41

42 **Word Count:** 4,608  
43

44 **Keywords:** injury, recovery, open fracture, experience, qualitative, body image, self-identity  
45  
46

47 **ABSTRACT**  
48  
49

50  
51  
52 **Objectives:** Treatment of open fractures is complex and patients may require muscle and skin grafts. The aim  
53  
54 of this study was to gain a greater understanding of patient experience of recovery from open fracture of the  
55  
56 lower limb two to four years post-injury.  
57  
58  
59  
60

1  
2  
3 **Design:** A phenomenological approach was used to guide the design of the study. Interviews took place  
4  
5 between October 2016 and April 2017 in the participants' own homes or via telephone.  
6

7 **Setting:** England, UK.  
8

9 **Participants:** A purposive sample of 25 patients were interviewed with an age range of 26-80 years (median  
10  
11 51), 19 were male and six female, and time since injury was 24-49 months (median 35 months).  
12

13 **Results:** The findings identified a focus on struggling to recover as participants created a new way of living,  
14  
15 balancing moving forward with accepting how they are, whilst being uncertain of the future and experiencing  
16  
17 cycles of progress and setbacks. This was expressed through three themes: i) 'being disempowered' with the  
18  
19 emotional impact of dependency and uncertainty, ii) 'being changed' and living with being fragile and being  
20  
21 unable to move freely and iii) 'being myself' with a loss of self, feeling and looking different, alongside  
22  
23 recreation of self in which they integrated the past, present and future to find meaningful ways of being  
24  
25 themselves.  
26

27 **Conclusion:** This study identified the long-term disruption caused by serious injury, the hidden work of  
28  
29 integration that is required in order to move forward and maximise potential for recovery. Supportive  
30  
31 strategies that help people to self-manage their everyday emotional and physical experience of recovery from  
32  
33 injury are required. Research should focus on developing and testing effective interventions that provide  
34  
35 support and self-management within a holistic rehabilitation plan.  
36

## 37 38 **ARTICLE SUMMARY** 39

### 40 41 **Strengths and limitations of this study** 42

- 43 • Use of in-depth qualitative interviews has provided rich data and new insights into the hidden work  
44  
45 undertaken by patients as they recover from major lower leg injury.  
46
- 47 • The variation and patterns within the patients' experience may help healthcare providers focus  
48  
49 effective strategies to maximise emotional and physical recovery over the longer term.  
50
- 51 • Our study was intentionally exploratory in nature and the resulting framework requires further  
52  
53 exploration in diverse samples to assess its transferability.  
54  
55  
56  
57  
58  
59  
60

## INTRODUCTION

Open fractures of the lower limb (where the bone protrudes through the skin) occur in an estimated 30% of fractures of the tibia.<sup>[1]</sup> Treatment is complex as the wound requires surgical cleaning before fixation of the bone, often followed by muscle and skin grafting. The UK WOLLF Wound management of Open Lower Limb Fractures trial compared standard dressings with Negative Pressure Wound Therapy (NPWT).<sup>[2]</sup> Negative Pressure Wound Therapy is a type of dressing that applies a gentle suction to the wound removing excess fluid. Two qualitative sub-studies of this trial were undertaken to explore the lived experience of patients with an open fracture of the lower limb, firstly during hospitalisation, and secondly, this paper presents the findings from two to four years post-injury.

There is increasing evidence that the impact of open fracture of the lower limb can be life changing with prolonged periods of recovery. Embodied vulnerability conveys how patients with open fractures of the lower limb struggled to cope with their emotional distress, their changed body which included their wounds, body image, pain and the uncertain nature of their future life.<sup>[3]</sup> Recovery can be slow and patients can find it hard to return to their pre-injury lives even 2 years after an open fracture.<sup>[4]</sup> Studies with a broader sample of injured patients identify the ongoing challenge of daily living, being able to work and body image.<sup>[5]</sup> There is also evidence of persisting psychological distress.<sup>[6]</sup> In order to provide direction for long term support and rehabilitation this qualitative study develops existing knowledge by exploring the research question, what are patients' experiences of recovery from an open fracture of the lower limb two to four years post injury?

## METHODS

This study was informed by phenomenology and the work of Heidegger<sup>[7]</sup> used in other studies of injury.<sup>[8,9]</sup> This enabled participants to share their experience of everyday life within their social and cultural context. It uncovered insights into how they know and understand their world and what is important to them. Immersion in the data and interpretation led to an understanding of the meanings inherent in the everyday world of the participant. The project was given ethical approval by West Midlands Coventry and Warwickshire Research Ethics Committee (REC Reference: 12/WM/0001) in June 2016.

A purposive sample of 25 participants were recruited between October 2016 and April 2017, during routine follow up. Interviewees were participants in the UK WOLLF trial<sup>[2]</sup> and had received reconstructive surgery for

1  
2  
3 an open fracture to the lower limb. Purposive sampling included a range of sex, age and grade of severity of  
4  
5 injury. A key eligibility criteria for the UK WOLFF trial was that at the end of the first surgical wound  
6  
7 debridement the wound could not be closed. This was required for the trial, as the NPWT dressings under  
8  
9 investigation cannot be applied to closed wounds, but does not fit clearly with the existing classification  
10  
11 systems. Only patients with a higher grade of open fracture were included where skin or muscle grafts are  
12  
13 required. Three sub-divisions of the Gustilo and Anderson<sup>[10]</sup> classification were used, grade II, grade III  
14  
15 (inclusive of a/b) or grade IIIc with a vascular injury. See table 1 for information on the participants' sex, age,  
16  
17 time since injury, cause of injury and injury severity. Two people approached chose not to take part due to  
18  
19 personal circumstances and lack of time. Respondents received a patient information sheet and provided  
20  
21 written or oral consent to take part in an interview. The interviews focused on the participants' lived  
22  
23 experience of recovery from injury and were lightly structured to cover their thoughts, feelings, activities,  
24  
25 function and work. Open questions such as 'what has it been like for you since your injury', with prompts such  
26  
27 as 'tell me more about that', 'how did that feel', were used to enable participants to share their experience.  
28  
29 Two female health researchers with PhDs who did not know the participants undertook the interviews (SR  
30  
31 (n=15) and ET (n=10)), either face-to-face (usually at the participant's own home, once at a nearby hospital) or  
32  
33 over the telephone. Two participants were accompanied by their partners. Care was taken to support  
34  
35 participants and respect their privacy and dignity. One interviewer had experience of interviewing patients  
36  
37 with cancer and a background in medical sociology, the other had prior experience of interviewing patients  
38  
39 with traumatic orthopaedic injuries. Interviews lasted 25-100 minutes (average 60 minutes) and were digitally  
40  
41 audio-recorded and transcribed verbatim. Data was anonymised and held on secure password protected  
42  
43 University computers. None of the participants wished to see a copy of their transcript.  
44  
45  
46  
47  
48

49  
50  
51  
52  
53  
54  
55  
56  
57  
58  
59  
60  
Table 1 Information about the participants

| Table 1 Information about participants |                        |
|----------------------------------------|------------------------|
| Characteristics                        | Number of participants |
| Sex                                    |                        |
| Male                                   | 19                     |
| Female                                 | 6                      |

|                                                             |    |
|-------------------------------------------------------------|----|
| <b>Age (years) mean 51, range 26-80</b>                     |    |
| 18-29                                                       | 4  |
| 30-49                                                       | 8  |
| 50-69                                                       | 9  |
| 70-80                                                       | 4  |
| <b>Time since injury (months) mean 31, range 24-49</b>      |    |
| 24-35 months                                                | 14 |
| 36-49 months                                                | 11 |
| <b>Cause of Injury</b>                                      |    |
| Car collision                                               | 8  |
| Motorbike collision                                         | 5  |
| Pedestrian-vehicle collision                                | 3  |
| Fall from height/stairs                                     | 3  |
| Crush injury at work                                        | 3  |
| Low energy fall (from standing)                             | 2  |
| Bicycle-vehicle collision                                   | 1  |
| <b>Injury severity, Gustilo and Anderson classification</b> |    |
| II                                                          | 4  |
| III (inclusive of a/b)                                      | 18 |
| IIIc                                                        | 3  |

#### Patient and Public Involvement

Patient and public involvement (PPI) was integral to the design and conduct of the UK WOLLF study. Four patients with similar injuries who were members of the UK WOLLF PPI group helped the researchers reflect on their interpretations during analysis. The UK Musculoskeletal Trauma PPI group are involved in dissemination of the findings.

#### Analysis

1  
2  
3 Analysis was undertaken by two researchers (SR and ET), was an iterative process involving initial coding of  
4 sections of the data to label the underlying meaning or 'what is going on' in the data such as 'feeling sad due  
5 to lack of progress'. Codes were collected together with other similar codes to create categories such as 'being  
6 uncertain'. Differences and challenges within interviews and across interviews were written up in field notes  
7 and memos, and discussed. Categories were collected together to create themes or 'structures of  
8 experience'<sup>[11]</sup> such as 'being disempowered'. NVivo 11 a qualitative software package was used to manage  
9 the data (QSR Warrington, UK). The findings were shared with the broader research team. Differences in  
10 interpretation were discussed as part of the process of analysis but in general there was agreement about the  
11 nature and content of the three themes.

12  
13 Rigour was demonstrated through trustworthiness.<sup>[12]</sup> Both researchers were engaged with the data, held  
14 regular discussions and reflected on their positionality throughout analysis. Auditability was demonstrated  
15 through the identification of themes and categories and use of quotes to illustrate them. Saturation of themes  
16 and categories was achieved. This was indicated when no new themes or categories developed after 18  
17 patients were interviewed. Interviewing continued to ensure the sample was purposeful and there was a range  
18 of codes in each category. Resonance with the findings was identified by four patients from the UK WOLFF PPI  
19 group. It was noted that they placed emphasis on existing codes that identified challenges with intimacy and  
20 gratefulness for care provided. A workshop including a range of multidisciplinary staff representing nursing,  
21 physiotherapy, trauma surgeons, plastic surgeons and psychologists suggested the findings reflected their  
22 experience of listening to patients in clinical practice, although they held differing perspectives on the degree  
23 of importance of items and labelling of codes. For example they felt some codes could be drawn together  
24 under the broader labels of anxiety or depression.

## 25 26 27 28 29 30 31 32 33 34 35 36 37 38 39 40 41 42 43 44 45 46 47 **RESULTS**

48  
49 Overarching theme: Struggling to recover

50  
51  
52 The findings convey the overarching theme of 'struggling to recover' as an experiential process in which  
53 participants aim to make sense of their injury, balance striving to move forward with accepting how they are,  
54 and find meaningful ways of living whilst being uncertain of the future and experiencing cycles of progress and  
55 setbacks.  
56  
57  
58  
59  
60

1  
2  
3  
4  
5  
6 In struggling to recover participants conveyed that their 'taken for granted' ways of living experienced prior to  
7  
8 injury were replaced with daily challenge as they endured symptoms such as persistent pain. They often hid  
9  
10 the struggle to keep going to maximise participation and maintain a sense of progression.

11  
12 They can see people walking but there is no light or pain-meter on top of the head that says 'this guy  
13  
14 is in absolute agony but he's not going to stop walking because he doesn't want to go in a mobility  
15  
16 scooter'. People look at you and say 'You're getting on great aren't you?' All you really just want to  
17  
18 say to them is 'Every day I struggle' and some days you just want to sit and cry your eyes out. – P13

19  
20  
21 Loss caused by injury led participants to re-negotiate how they live and to integrate their past and present self  
22  
23 into new ways of being. This was portrayed through the themes of being disempowered, being changed, and  
24  
25 being myself.

#### 26 27 28 Theme 1: Being disempowered

29  
30 Being disempowered conveyed the emotional and physical impact on participants of loss of personal control  
31  
32 over their life and was expressed through the categories 'being dependent on others' and 'being uncertain  
33  
34 about the future'.

#### 35 36 37 *Being dependent on others*

38  
39 Being dependent on others was a process of accepting help from others whilst striving to maintain a sense of  
40  
41 independence through activities that supported their mental and physical wellbeing. Many participants had  
42  
43 prolonged periods where they were not able to put weight through their injured leg, and some had injuries to  
44  
45 both legs. Dependency on others created frustration, boredom, distress, dismay, was undignified, lowered  
46  
47 their mood and was epitomised by not even being able to perform simple tasks, such as to make a cup of tea.

48  
49 I don't know if it's a man thing or male thing, I don't know. It's your dignity, I mean the last person  
50  
51 who wiped my arse was my mum and that's it, or my dad, but being a grown man using a bed pan  
52  
53 because I couldn't get out of bed was awful. – P06

54  
55  
56 In this state of profound dependency their body became central to everyday life, its needs and limitations  
57  
58 explicitly governing every aspect of everyday life.  
59  
60

1  
2  
3 You feel a bit like a passenger in it all because you're on the outside looking in and you think you're  
4 being a bit of a burden on everyone. At the time I found it quite hard to almost tell people that's how  
5 I felt, I feel this, I feel a bit worthless. – P18  
6  
7  
8  
9

10 Constant support for daily bodily needs could lower their mood so that they could no longer see the 'light at  
11 the end of the tunnel' (P17) evident in suicidal thoughts.  
12  
13

14 I thought about topping myself because it's like I've been independent all my life. ... One night I had  
15 all the tablets, Tramadol. – P06  
16  
17  
18

19 Dependency on others was a disempowering experience that led to emotional vulnerability. Expressing how  
20 they felt was challenging in the context of being grateful for the care they had received and some had suicidal  
21 thoughts.  
22  
23  
24  
25

### 26 *Being uncertain about the future*

27

28 Being uncertain about the future conveyed the emotional impact of not knowing their potential degree of  
29 recovery, and what life would be like in the future. Being uncertain about their future added to participants'  
30 sense of disempowerment. Participants found it hard to imagine walking properly or returning to pre-injury  
31 activities and a 'wait and see' approach added to their sense of uncertainty.  
32  
33  
34  
35

36 I would say that was the toughest part, was just the un-endingness of it, it was just constant and it  
37 was horrible. – P19  
38  
39  
40

41 I did think in my mind you know 'it will heal and then I've got rehabilitation' but this whole non-union,  
42 it just dragged on and on and on, I couldn't see an end. ... I wished I'd known about the non-union,  
43 err, it was almost hidden from me. ... I said 'well I thought that the operation was successful?' then he  
44 told me 'well it was because we would've cut your leg off years ago'. – P21  
45  
46  
47  
48  
49

50 There was a degree of anxiety regarding their future and ability to live and work productively.  
51  
52

53 You want to live for the future now because that's what you've got in front of you but you worry  
54 about what it's going to bring, not only physically but financially as well. You have no idea what your  
55 pay-out is going to be and so my life is in somebody else's hands. There is that horrible thought that  
56  
57  
58  
59  
60

1  
2  
3 you may have to go back out to work, force yourself to work because financially you can't exist for the  
4  
5 rest of your life. – P13  
6  
7

8 Their capacity to heal often determined their future; leaving them feeling uncertain, disempowered and  
9  
10 anxious. This was exacerbated by setbacks such as non-union (also noted in recreating me) that reduced their  
11  
12 ability to sustain recovery.  
13

#### 14 Theme 2: Being changed

15  
16 Being changed identified how their body no longer looks, feels or functions in ways it had previously. Everyday  
17  
18 life involved a process of re-negotiating where participants learnt through experience what they could do and  
19  
20 how they felt about their body whilst striving to regain and retain normal activities. It was expressed through  
21  
22 the categories of being fragile and being unable to move freely.  
23

#### 24 *Being fragile*

25  
26 Being fragile conveyed a sense of their body as looking and feeling less robust, less trustworthy, less reliable  
27  
28 and active engagement was required to reconnect in a positive way with their changed body. Participants were  
29  
30 predominantly young or middle-aged adults, and many had been previously fit and active individuals. They  
31  
32 now felt their body was older, weaker, and more fragile.  
33  
34

35  
36 I can't dig. ... I feel like I've got a weakness which has left me feeling like I've got a bit of a disability. –  
37

38 P21  
39

40  
41 Participants felt a need to protect their injured body, or at least the injured limb, including avoiding activities  
42  
43 due to the fear of experiencing another injury.  
44

45  
46 You're frightened it's gonna (going to) break again. – P02  
47

48  
49 The sense of a whole, continuous body which the participants felt they could trust to do the activities they  
50  
51 wanted to do was disturbed and instead participants could experience their bodies as alien and fragile.  
52

53  
54 I do go running and I wear long running trousers because I think if I see it (the muscle graft) it makes  
55  
56 me feel like there's a weakness there and it makes me very aware, I don't think it is any weaker, the  
57  
58 leg, but mentally it makes me think it's a bit weaker and I just find it distracting as well if I exercise it. I  
59  
60 probably would be over-cautious and not really exercise it properly if I could see it I think. – P14

1  
2  
3 Some participants described feeling distanced or alienated from the injured part of their body.  
4

5  
6 I don't look at it as my leg anymore. ... It is like the legs belongs to somebody else they don't  
7  
8 particularly belong to me. – P19  
9

10 Their injured body part was no longer fully integrated into their perception of their body. Parts of their body  
11  
12 had literally shifted places as skin/muscle from other areas of the body had been transplanted to cover the  
13  
14 defect in the leg. Pain and numbness could increase this sense of alienation.  
15

16  
17 Participants hid or covered up their injured leg, to avoid others perceiving them as fragile, less capable or  
18  
19 weak. For some participants the struggle with healing, pain and lack of mobility was so exhausting, that they  
20  
21 thought amputation might improve their chances of mobility and a better quality of life.  
22

23  
24 There were a couple of times in it all when I thought, would it be better off to say take it off but I  
25  
26 knew how hard and how much effort people had put in to make sure that leg was staying where it  
27  
28 was. – P18  
29

30  
31 If you took me back in time and I knew then what I know now I would have said 'take my leg off now'.  
32  
33 I'd be four years down the line with a prosthetic and I could probably still be working. – P13  
34

35 Being fragile highlighted the unreliability of their body and continued vulnerability to further injury. The sense  
36  
37 of a 'whole' body could be disrupted and amputation was considered in an effort to improve chances of  
38  
39 recovery.  
40

#### 41 42 *Being unable to move freely* 43

44  
45 Being unable to move freely was the loss of ease, fluidity and previously taken-for-granted ways of moving, it  
46  
47 affected their ability to use certain geographical spaces and effort was required to improve levels of physical  
48  
49 activity. Despite being between two to four years post injury, participants felt they were not able to move with  
50  
51 the same fluidity or spontaneity. The way they walked, their pace, gait or balance was different.  
52

53  
54 I can't move fast anymore. – P17  
55

56  
57 My balance was all over the place, it still is, sometimes I feel like I'm falling to the side, it's a weird  
58  
59 feeling. – P01  
60

1  
2  
3 I waddle, I walk like a penguin it's the only way I can balance, sort of putting weight on one foot and  
4  
5 then going over to the next foot, I can't stride out anymore. – P02  
6

7  
8 Specific activities such as being able to kneel prevented them from moving as freely. Some participants felt the  
9  
10 area where they had a soft tissue/muscle flap used in reconstructive surgery was heavy (notable when  
11  
12 sleeping), or they experienced swelling and pain. Persistent pain reduced their ability to move and join in  
13  
14 activities, it varied in type and duration but sometimes was prolonged and often unpredictable.  
15

16  
17 I sit down for an hour and I get up, oh the pain you can't describe it, but I mean it's for seconds but  
18  
19 it's enough to, it's really, really painful. – P02  
20

21  
22 Participants experienced restrictions on the spaces and places they felt confident occupying. They were  
23  
24 worried about falling and injuring themselves again. The terrain underfoot, types of floor or ground could  
25  
26 cause pain leading them to be constantly vigilant.  
27

28  
29 Participants felt changed, even if they had returned to work, often with an increased sense of fragility, loss of  
30  
31 fluidity and pace of movement, combined with specific functional losses. They hid this fragility from others,  
32  
33 undertook additional planning for daily activities, limited social participation and changed their work roles in  
34  
35 order to cope with their injury.  
36

### 37 Theme 3: Being myself

38  
39 Being myself was an active process of integrating injury into their sense of who they were as a person, bringing  
40  
41 together the past, present and future. It was expressed through loss of self and 'recreating me'. Participants  
42  
43 worked to integrate their injury into their lives expressed through 'loss of self' and 'recreating me'.  
44

#### 45 *Loss of self*

46  
47  
48 Loss of self was expressed as participants felt and looked different and were unable to fulfil their normal roles  
49  
50 and activities as they did prior to their injury. In loss of self, there was a sense that the body 'restricts me from  
51  
52 being me' and participants had to adapt to being different from their pre-injury state.  
53

54  
55 It seemed like a part of my life stopped at 6.45 on (date of injury) and a new life started. ... I used to  
56  
57 think nothing of walking ten to fifteen miles a day along disused railway lines and things like that, we  
58  
59 were avid walkers. – P04  
60

1  
2  
3 Participants' current experience contradicted their memories of who they were.  
4  
5

6 I have 55 years' worth of memories inside my head so you think 'Oh I used to go running on a  
7  
8 Saturday morning'. ... You try and be the person you were before and you can't be because you are  
9  
10 95% of what you used to be. But it's just that 5% area that causes you 100% of the problems. – P13  
11  
12 Some days I, I could scream. I wake in the morning and 'cause you forget', you know when you go to  
13  
14 sleep, and I wake up in the morning thinking I can just jump out of bed and I can't and then it hits you  
15  
16 and you think 'Oh God I can't do this!' – P02  
17  
18

19 Their body thwarted their attempts to return to their former selves. Despite regaining their independence and  
20  
21 feeling that their healthcare team considered them to be recovered, the participants were continually  
22  
23 reminded of their injured bodies.  
24  
25

26 It's very difficult to have a day where you are not conscious of 'that hurts'. ... In an active way you are  
27  
28 kind of constantly reminded because it's never quite the same day to day. – P22  
29  
30

31 In contrast to younger patients, older participants located the injury within the context of prior conditions and  
32  
33 they did not experience the same degree of challenge to their identity.  
34  
35

36 The event (which) bears more on how I think about life in general is having been fortunate to survive  
37  
38 a heart attack ten years ago. ... So that sort of in a way puts things in perspective. I know falling off a  
39  
40 roof can initially be thought of as a life-threatening event but a cardiac arrest is definitely a life-  
41  
42 threatening event! – P08  
43  
44

45 Participants struggled with the loss of their pre-injured self and the activities that defined them. Despite  
46  
47 attempts to move forward and integrate with the present they found their unreliable body provided sensory  
48  
49 reminders of their loss and their injury.  
50

### 51 *Recreating me*

52

53 Recreating me referred to the ways in which participants made sense of their altered selves, worked on their  
54  
55 body and mind to find meaningful ways of being and living. In making sense of their injury they reflected on  
56  
57 how life had been and tried to reconcile this with how they felt now.  
58  
59  
60

1  
2  
3 It did come as a revelation about three weeks ago, just you know, I can't carry on doing this, I can't  
4 keep pushing to get my life back, it's got you know, I've got to change, you know it is a bit of a shock!  
5  
6  
7 – P19  
8  
9

10 I used to think 'I wished the thing had never fallen on me!' but now I think I've got to that stage where  
11 I've passed that and I think I have just slipped, probably slipped back into normality if, um, I, I sort of  
12 lived with this problem and that's then become me, so maybe you adapt. – P21  
13  
14  
15

16 Participants tried to return to usual activities but recovery was characterised by ups and downs. Some felt  
17 their recovery was delayed by further injuries described by participants as 'stress fractures', 'snapped (torn)  
18 hamstrings' (muscles at the back of the thigh), or injury to their 'iliotibial bands' (connective tissue running  
19 from the pelvis to the knee). Only a small number of participants reported receiving enough physiotherapy  
20 after their injury. Those who received physiotherapy (usually privately), described a more purposeful recovery  
21 with fewer examples of setbacks and less uncertainty.  
22  
23  
24  
25  
26  
27  
28

29 I think she took it upon herself to get me back to where I wanted to be and I think she listened to  
30 what I wanted out of life. – P18  
31  
32  
33

34 Some participants expressed gratitude to be alive or to have avoided amputation. They tried to locate meaning  
35 in what happened to them.  
36  
37

38 I went back and met another patient and his family and I hope that I gave them a little bit more hope.  
39  
40 ... It was good for me as well for my rehabilitation to feel that it wasn't all for nothing. – P18  
41  
42

43 For these participants, they were able to find meaning in their injury, and so to incorporate it into their  
44 biography, or their story of themselves. Participants engaged in 'body work' in order to convey a sense of  
45 normality and provide the appearance of a non-injured body. However, often participants described struggling  
46 with the difference between others' expectations and the reality of their everyday experience.  
47  
48  
49  
50

51 I think when people think you're doing so well physically they just think 'she's doing really well' and  
52 you almost don't want to turn around and say 'well actually I'm really struggling with this, that and  
53 the other' because I just don't want to disappoint people or turn it into a negative thing. – P14  
54  
55  
56  
57  
58  
59  
60

1  
2  
3 In recreating me the participants were hindered by their injured body and a lack of supportive therapies but  
4  
5 tried to integrate their past and present self-identity. New opportunities and meaningful ways of living that  
6  
7 were beneficial could be found. There was a strong desire to appear normal and participants struggled to be  
8  
9 themselves.

## 11 **DISCUSSION**

12  
13  
14 This qualitative study adds to recent research on the patient experience of open fractures of the lower limb in  
15  
16 acute care<sup>[3,9]</sup> and post injury<sup>[4]</sup> by identifying the ongoing recovery undertaken by patients to process the  
17  
18 impact of injury on their sense of being disempowered, being changed and being myself. We have specifically  
19  
20 focussed on the longer-term (two to four year post-injury) impact of these injuries and especially in those  
21  
22 patients who were identified as having injuries on the 'severe' end of the spectrum. We found that the  
23  
24 concept of embodied vulnerability,<sup>[3,9]</sup> and endurance in early recovery<sup>[8]</sup>, clearly identified in acute care, also  
25  
26 extends into the longer-term as participants struggle to recover, processing their loss, working to negotiate  
27  
28 how they live and integrate changes within their self-identity. Our findings indicate that longer term clinical  
29  
30 support is required to improve outcomes for mental health, function, management of pain and living with  
31  
32 disability in patients with major trauma to the lower limbs.

33  
34  
35 There were some limitations to our study. The sample was limited to those taking part in the UK WOLLF trial  
36  
37 and participants may have different attributes to those who decline to take part in a clinical trial and be  
38  
39 interviewed. Those agreeing to take part in an interview up to four years after injury may be less likely to  
40  
41 consider themselves as recovered, thus be more representative of those with chronic ongoing problems. The  
42  
43 sample was also not ethnically diverse and sampling at specific time points during recovery may have  
44  
45 increased the transferability of the study findings to other populations. However the UK WOLLF sample were  
46  
47 considered to be representative of the general population with severe open fractures.<sup>[2]</sup> Our sample was  
48  
49 purposive within the UK WOLLF population and saturation of data was achieved. Four patients with similar  
50  
51 injuries (UK WOLLF PPI group) felt their personal experience resonated with the findings of this study however  
52  
53 they also highlighted the joy of recovery, gratefulness to staff for their care, the similarity of the findings to,  
54  
55 but also the difference from, their individual experience. Despite these limitations, this study provides  
56  
57 evidence that patients who suffered the more severe injuries may benefit from enhanced clinical attention  
58  
59 that focusses on distress, uncertainty, fragility and body image over a prolonged period of time. Psychological  
60

1  
2  
3 distress<sup>[6,13]</sup> is present in this group and may be linked to ongoing disability.<sup>[14]</sup> The continued uncertainty that  
4 patients feel reflects elements of a chaos narrative <sup>[15]</sup>, where loss of control means it is hard to find meaning  
5 in daily life. In our study despair, noted in recovery from trauma <sup>[16]</sup> was expressed as suicidal thoughts. Their  
6 perceptions of the body as fragile and weak suggest a state of dys-embodiment<sup>[17] [18]</sup> where dysfunction  
7 highlights the loss of normal taken for granted ways of being. Ongoing disruption to body image is noted in  
8 studies of stigma and disfigurement<sup>[19]</sup> and in societal pressure to appear recovered<sup>[20]</sup> and attractive.<sup>[21]</sup> In this  
9 study, amputation was considered as an alternative solution to continued challenges and dissociation from the  
10 body occurred, as in other specialities.<sup>[22]</sup> Patients' progression towards integration of physical change and self-  
11 identity was hindered by reminders of their injury, such as persistent pain, as their unreliable body<sup>[23]</sup> was  
12 unable to achieve the intended activity. This process is noted in chronic illness<sup>[24]</sup> and major trauma patients  
13 three to six months post injury.<sup>[25]</sup> Support that enables patients to feel a greater sense of empowerment and  
14 integrate bodily changes within their self-identity may be helpful. Research should therefore focus on  
15 developing and testing effective interventions that provide longer term support and self-management within a  
16 holistic rehabilitation plan.

## 31 STATEMENTS

### 32 Funding statement

33 This work was supported by the UK National Institute for Health Research, Health Technology Assessment  
34 (HTA) Programme (project number 10/57/20) and was supported by the National Institute for Health Research  
35 (NIHR) Oxford Biomedical Centre.

### 36 Competing interests

37 No benefits have been received or will be received from a commercial party related directly or indirectly to the  
38 subject of this article.

### 39 Acknowledgements

40 The authors would like to thank all the patients who generously gave their time and energy to support this  
41 study. In addition we would like to thank the PPI participants and staff who facilitated aspects of this study  
42 particularly Chris Bouse.

### Author contributions

SR and ET contributed equally to this paper. The design, data collection, analysis and drafting of the paper were jointly undertaken by SR and ET. The team JA, JB, MC supported the project, were involved in discussion of the findings and the development of this paper.

### Ethical approval

The project was given ethical approval by West Midlands Coventry and Warwickshire Research Ethics Committee (REC Reference: 12/WM/0001) in June 2016.

### Consent and Confidentiality

All participants received an information sheet and at least 24 hours to consider their participation. Written informed consent or verbal consent over the telephone were obtained.

### Check list

The checklist has been completed and submitted.

### Data sharing statement

We do not have consent for data sharing from the study participants.

### Exclusive License

The Submitting Author accepts and understands that any supply made under these terms is made by BMJ to the Submitting Author unless you are acting as an employee on behalf of your employer or a postgraduate student of an affiliated institution which is paying any applicable article publishing charge ("APC") for Open Access articles. Where the Submitting Author wishes to make the Work available on an Open Access basis (and intends to pay the relevant APC), the terms of reuse of such Open Access shall be governed by a Creative Commons licence – details of these licences and which [Creative Commons](#) licence will apply to this Work are set out in our licence referred to above.

### REFERENCES

1. Court-Brown C, Bugler KE, Clement ND, et al. The epidemiology of open fractures in adults. A 15-year review. *Injury* 2012;43(6):891-97.

2. Costa ML, Achten J, Bruce J, et al. Effect of Negative Pressure Wound Therapy vs Standard Wound Management on 12-Month Disability Among Adults With Severe Open Fracture of the Lower Limb: The WOLFF Randomized Clinical Trial. *JAMA* 2018;319(22):2280-88. doi: 10.1001/jama.2018.6452
3. Tutton E, Achten J, Lamb SE, et al. A qualitative study of patient experience of an open fracture of the lower limb during acute care. *Bone Joint J* 2018;100-B(4):522-26. doi: 10.1302/0301-620X.100B4.BJJ-2017-0891.R1
4. Trickett R, Mudge E, Price P, et al. A qualitative approach to recovery after open tibial fracture: the road to a novel, patient-derived recovery scale. *Injury* 2012;43(7):1071-78.
5. McPhail SM, Dunstan J, Canning J, et al. Life impact of ankle fractures: qualitative analysis of patient and clinician experiences. *BMC musculoskeletal disorders* 2012;13(1):224.
6. McCarthy ML, MacKenzie EJ, Edwin D, et al. Psychological distress associated with severe lower-limb injury. *JBJS* 2003;85(9):1689-97.
7. Heidegger M. *Being and Time*. Oxford: Blackwell Publishing Ltd 1962.
8. Keene DJ, Mistry D, Nam J, et al. The Ankle Injury Management (AIM) trial: a pragmatic, multicentre, equivalence randomised controlled trial and economic evaluation comparing close contact casting with open surgical reduction and internal fixation in the treatment of unstable ankle fractures in patients aged over 60 years. *Health Technol Assess* 2016;20(75):1-158. doi: 10.3310/hta20750
9. Costa ML, Achten J, Bruce J, et al. Negative-pressure wound therapy versus standard dressings for adults with an open lower limb fracture: the WOLFF RCT. *Health Technol Assess* 2018;22(73):1-162. doi: 10.3310/hta22730 [published Online First: 2018/12/24]
10. Gustilo RB, Anderson JT. Prevention of infection in the treatment of one thousand and twenty-five open fractures of long bones: retrospective and prospective analyses. *J Bone Joint Surg Am* 1976;58(4):453-8.
11. Van Manen M. *Researching Lived Experience, human science for an action sensitive pedagogy*. Albany: State University of New York Press 1990.
12. Lincoln YS, Guba E. *Naturalistic Inquiry*. Newbury Park, California: Sage Publications Inc 1985.
13. Bryant RA, O'Donnell ML, Creamer M, et al. The psychiatric sequelae of traumatic injury. *Am J Psychiatry* 2010;167(3):312-20. doi: 10.1176/appi.ajp.2009.09050617
14. Crichlow RJ, Andres PL, Morrison SM, et al. Depression in orthopaedic trauma patients. Prevalence and severity. *J Bone Joint Surg Am* 2006;88(9):1927-33. doi: 10.2106/JBJS.D.02604
15. Frank RW. *The Wounded StoryTeller: Body, Illness & Ethics* Second ed. Chicago and London: The University of Chicago Press 2013.
16. Tutton E, Seers K, Langstaff D. Hope in orthopaedic trauma: a qualitative study. *Int J Nurs Stud* 2012;49(7):872-9. doi: 10.1016/j.ijnurstu.2012.01.013
17. Leder D. *The absent body*: University of Chicago Press 1990.
18. Williams SJ. The vicissitudes of embodiment across the chronic illness trajectory. *Body & Society* 1996;2(2):23-47.
19. Rumsey N, Harcourt D. Body image and disfigurement: issues and interventions. *Body Image* 2004;1(1):83-97. doi: 10.1016/S1740-1445(03)00005-6
20. Rees S. A qualitative exploration of the meaning of the term "survivor" to young women living with a history of breast cancer. *Eur J Cancer Care (Engl)* 2018;27(3):e12847. doi: 10.1111/ecc.12847 [published Online First: 2018/04/10]
21. Nuffield Council on Bioethics. *Cosmetic procedures*, 2017.
22. Thorpe G, McArthur M, Richardson B. Bodily change following faecal stoma formation: qualitative interpretive synthesis. *J Adv Nurs* 2009;65(9):1778-89. doi: 10.1111/j.1365-2648.2009.05059.x
23. Kvigne K, Kirkevold M. Living with bodily strangeness: women's experiences of their changing and unpredictable body following a stroke. *Qual Health Res* 2003;13(9):1291-310.

- 1  
2  
3 24. Charmaz K. The body, identity, and self. *The Sociological Quarterly* 1995;36(4):657-80.  
4 25. Claydon JH, Robinson L, Aldridge SE. Patients' perceptions of repair, rehabilitation and recovery  
5 after major orthopaedic trauma: a qualitative study. *Physiotherapy* 2017;103(3):322-29. doi:  
6 10.1016/j.physio.2015.11.002  
7  
8  
9  
10  
11  
12  
13  
14  
15  
16  
17  
18  
19  
20  
21  
22  
23  
24  
25  
26  
27  
28  
29  
30  
31  
32  
33  
34  
35  
36  
37  
38  
39  
40  
41  
42  
43  
44  
45  
46  
47  
48  
49  
50  
51  
52  
53  
54  
55  
56  
57  
58  
59  
60

For peer review only

## COREQ (CONsolidated criteria for REporting Qualitative research) Checklist

A checklist of items that should be included in reports of qualitative research. You must report the page number in your manuscript where you consider each of the items listed in this checklist. If you have not included this information, either revise your manuscript accordingly before submitting or note N/A.

| Topic                                          | Item No. | Guide Questions/Description                                                                                                                              | Reported on Page No. |
|------------------------------------------------|----------|----------------------------------------------------------------------------------------------------------------------------------------------------------|----------------------|
| <b>Domain 1: Research team and reflexivity</b> |          |                                                                                                                                                          |                      |
| <i>Personal characteristics</i>                |          |                                                                                                                                                          |                      |
| Interviewer/facilitator                        | 1        | Which author/s conducted the interview or focus group?                                                                                                   |                      |
| Credentials                                    | 2        | What were the researcher's credentials? E.g. PhD, MD                                                                                                     |                      |
| Occupation                                     | 3        | What was their occupation at the time of the study?                                                                                                      |                      |
| Gender                                         | 4        | Was the researcher male or female?                                                                                                                       |                      |
| Experience and training                        | 5        | What experience or training did the researcher have?                                                                                                     |                      |
| <i>Relationship with participants</i>          |          |                                                                                                                                                          |                      |
| Relationship established                       | 6        | Was a relationship established prior to study commencement?                                                                                              |                      |
| Participant knowledge of the interviewer       | 7        | What did the participants know about the researcher? e.g. personal goals, reasons for doing the research                                                 |                      |
| Interviewer characteristics                    | 8        | What characteristics were reported about the interviewer/facilitator? e.g. Bias, assumptions, reasons and interests in the research topic                |                      |
| <b>Domain 2: Study design</b>                  |          |                                                                                                                                                          |                      |
| <i>Theoretical framework</i>                   |          |                                                                                                                                                          |                      |
| Methodological orientation and Theory          | 9        | What methodological orientation was stated to underpin the study? e.g. grounded theory, discourse analysis, ethnography, phenomenology, content analysis |                      |
| <i>Participant selection</i>                   |          |                                                                                                                                                          |                      |
| Sampling                                       | 10       | How were participants selected? e.g. purposive, convenience, consecutive, snowball                                                                       |                      |
| Method of approach                             | 11       | How were participants approached? e.g. face-to-face, telephone, mail, email                                                                              |                      |
| Sample size                                    | 12       | How many participants were in the study?                                                                                                                 |                      |
| Non-participation                              | 13       | How many people refused to participate or dropped out? Reasons?                                                                                          |                      |
| <i>Setting</i>                                 |          |                                                                                                                                                          |                      |
| Setting of data collection                     | 14       | Where was the data collected? e.g. home, clinic, workplace                                                                                               |                      |
| Presence of non-participants                   | 15       | Was anyone else present besides the participants and researchers?                                                                                        |                      |
| Description of sample                          | 16       | What are the important characteristics of the sample? e.g. demographic data, date                                                                        |                      |
| <i>Data collection</i>                         |          |                                                                                                                                                          |                      |
| Interview guide                                | 17       | Were questions, prompts, guides provided by the authors? Was it pilot tested?                                                                            |                      |
| Repeat interviews                              | 18       | Were repeat interviews carried out? If yes, how many?                                                                                                    |                      |
| Audio/visual recording                         | 19       | Did the research use audio or visual recording to collect the data?                                                                                      |                      |
| Field notes                                    | 20       | Were field notes made during and/or after the interview or focus group?                                                                                  |                      |
| Duration                                       | 21       | What was the duration of the interviews or focus group?                                                                                                  |                      |
| Data saturation                                | 22       | Was data saturation discussed?                                                                                                                           |                      |
| Transcripts returned                           | 23       | Were transcripts returned to participants for comment and/or                                                                                             |                      |

| Topic                                  | Item No. | Guide Questions/Description                                                                                                        | Reported on Page No. |
|----------------------------------------|----------|------------------------------------------------------------------------------------------------------------------------------------|----------------------|
|                                        |          | correction?                                                                                                                        |                      |
| <b>Domain 3: analysis and findings</b> |          |                                                                                                                                    |                      |
| <i>Data analysis</i>                   |          |                                                                                                                                    |                      |
| Number of data coders                  | 24       | How many data coders coded the data?                                                                                               |                      |
| Description of the coding tree         | 25       | Did authors provide a description of the coding tree?                                                                              |                      |
| Derivation of themes                   | 26       | Were themes identified in advance or derived from the data?                                                                        |                      |
| Software                               | 27       | What software, if applicable, was used to manage the data?                                                                         |                      |
| Participant checking                   | 28       | Did participants provide feedback on the findings?                                                                                 |                      |
| <i>Reporting</i>                       |          |                                                                                                                                    |                      |
| Quotations presented                   | 29       | Were participant quotations presented to illustrate the themes/findings?<br>Was each quotation identified? e.g. participant number |                      |
| Data and findings consistent           | 30       | Was there consistency between the data presented and the findings?                                                                 |                      |
| Clarity of major themes                | 31       | Were major themes clearly presented in the findings?                                                                               |                      |
| Clarity of minor themes                | 32       | Is there a description of diverse cases or discussion of minor themes?                                                             |                      |

Developed from: Tong A, Sainsbury P, Craig J. Consolidated criteria for reporting qualitative research (COREQ): a 32-item checklist for interviews and focus groups. *International Journal for Quality in Health Care*. 2007. Volume 19, Number 6: pp. 349 – 357

**Once you have completed this checklist, please save a copy and upload it as part of your submission. DO NOT include this checklist as part of the main manuscript document. It must be uploaded as a separate file.**
